# Supplementary material for: New Members of the Cinchona Alkaloids Family: Assembly of the Triazole Heterocycle at the 6′ Position
Source: MDPI journal article supplement (doi:10.3390/molecules26113357), 2021-06-02
Supplement: s1 [file s1]

# New members of the *Cinchona* Alkaloids family: Assembly of the triazole heterocycle at the 6' position.

Catalin Vasile Maftei <sup>1</sup>, Martin Heiko Franz <sup>1</sup>, Christian Kleeberg <sup>2</sup> and Ion Neda <sup>2,\*</sup>

<sup>1</sup> InnoChemTech GmbH, Hagenring 30, 38106 Braunschweig, Germany;  
catalinv.maftei@gmail.com (C.V.M.); franz@innocemtech.de (M.H.F.)

<sup>2</sup> Institut für Anorganische und Analytische Chemie, Technische Universität `Carola-Wilhelmina` Braunschweig, Hagenring 30, 38106 Braunschweig, Germany;  
ch.kleeberg@tu-braunschweig.de (C.K.), i.neda@tu-braunschweig.de (I.N.)

\* Correspondence: i.neda@tu-braunschweig.de

## Content

|                   |       |
|-------------------|-------|
| NMR experiments   | 2-21  |
| IR spectra        | 22-32 |
| x-Ray information | 33    |

## <sup>1</sup>H- and <sup>13</sup>C-NMR experiment

<sup>1</sup>H- and <sup>13</sup>C-NMR experiment for (S)-(6-azidoquinolin-4-yl)((1S,2R,4S,5R)-5-vinylquinuclidin-2-yl)methanol (8):

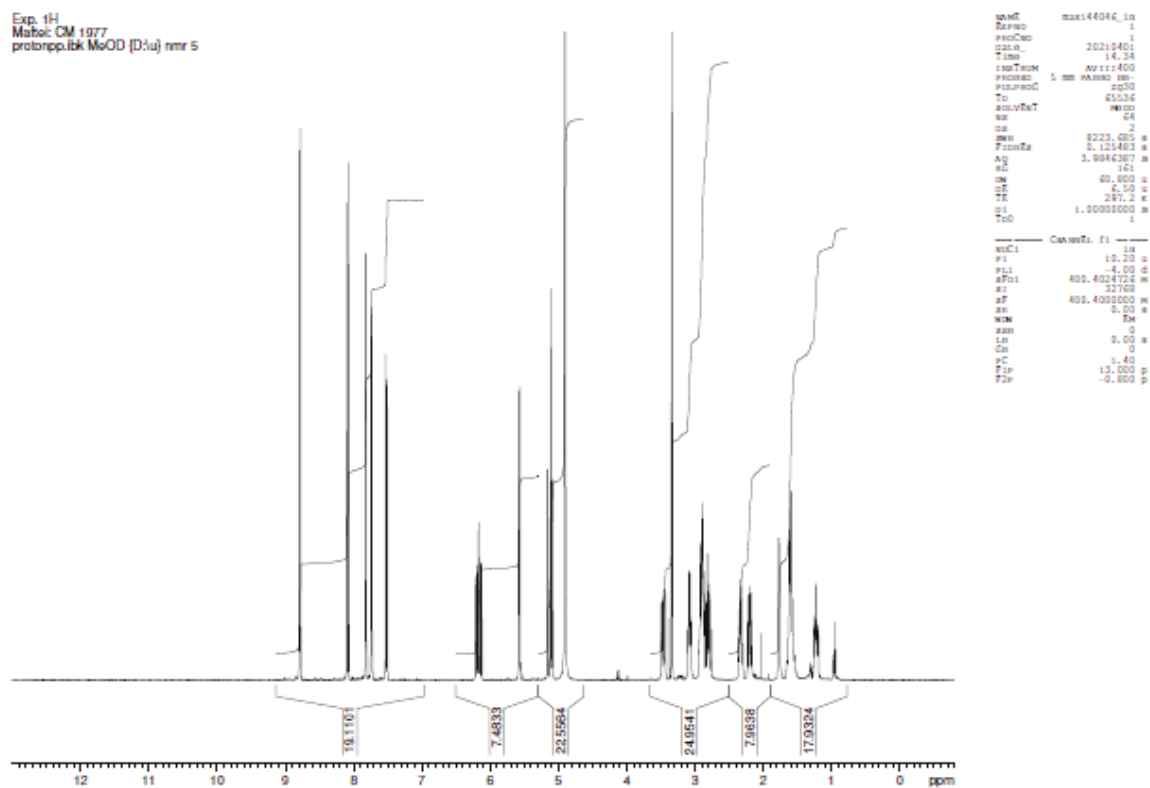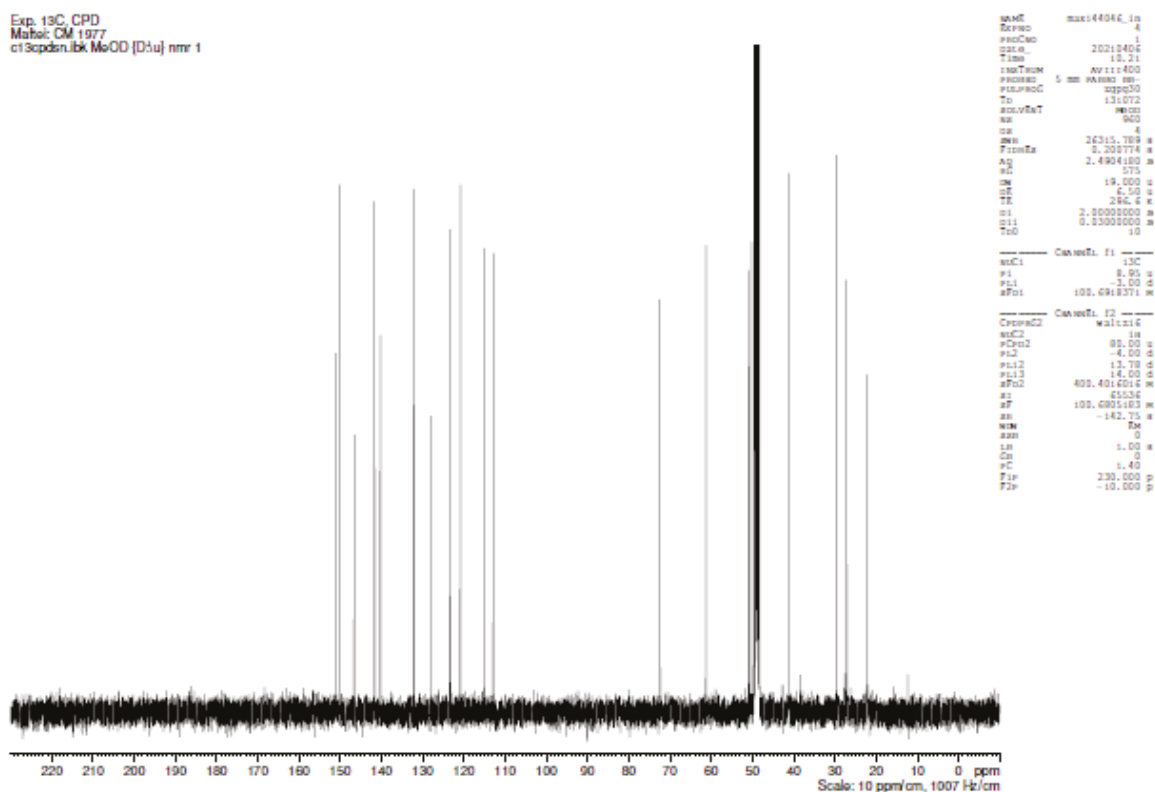

<sup>1</sup>H- and <sup>13</sup>C-NMR experiment for (R)-(6-azidoquinolin-4-yl)((1S,2S,4S,5R)-5-vinylquinuclidin-2-yl)methanol (9):

Exp. 1H  
Matsci: CM 1976  
protonpp.lib MeOD [D3u] nmr 4

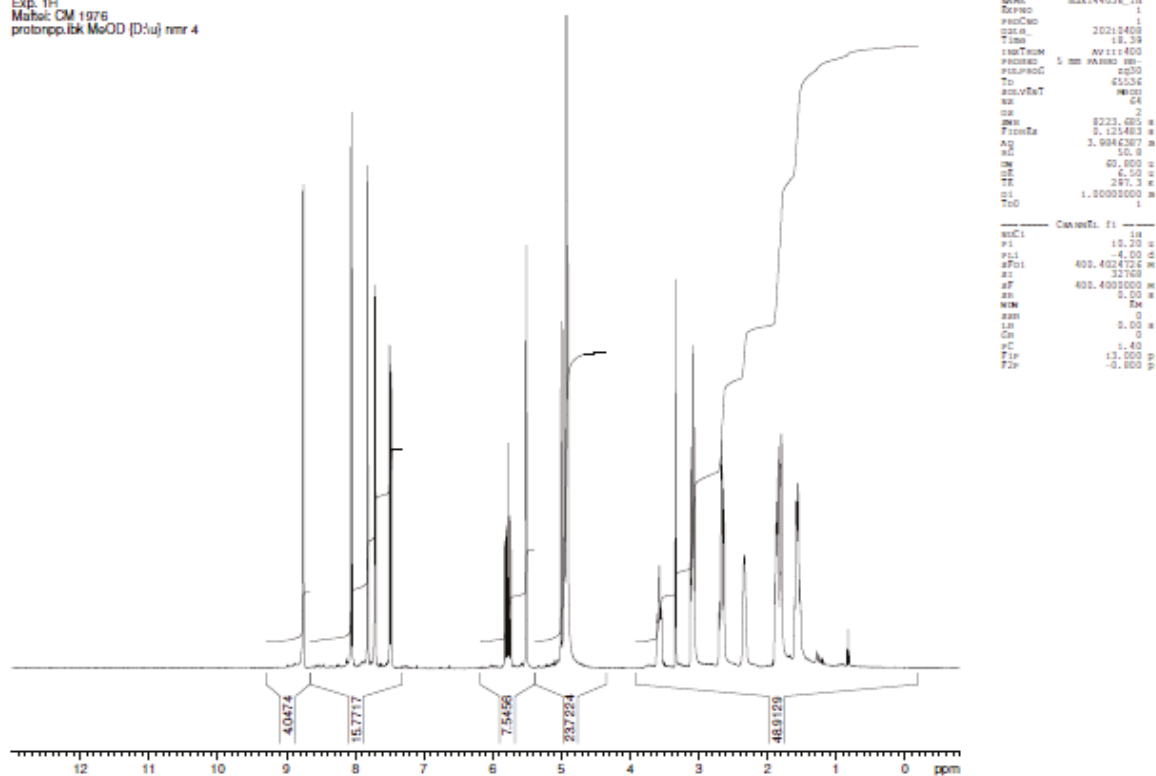

Exp. 13C, CPD  
Matsci: CM 1976  
c13cpdpp.lib MeOD [D3u] nmr 4

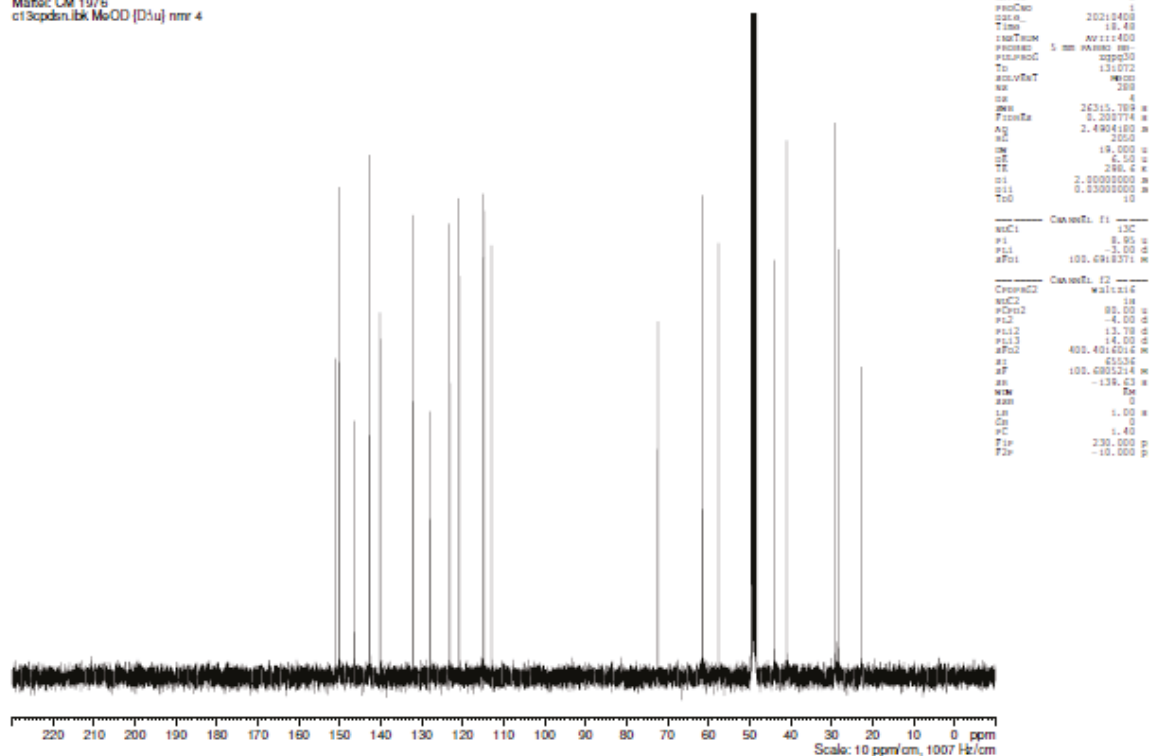

<sup>1</sup>H- and <sup>13</sup>C-NMR experiment for (S)-(6-azidoquinolin-4-yl)((1S,2R,4S,5R)-5-ethylquinuclidin-2-yl)methanol (**10**):

Exp. <sup>1</sup>H  
MatSci: CM 1979  
protonpp.libk DMSO [D<sub>2</sub>O] nmr 6

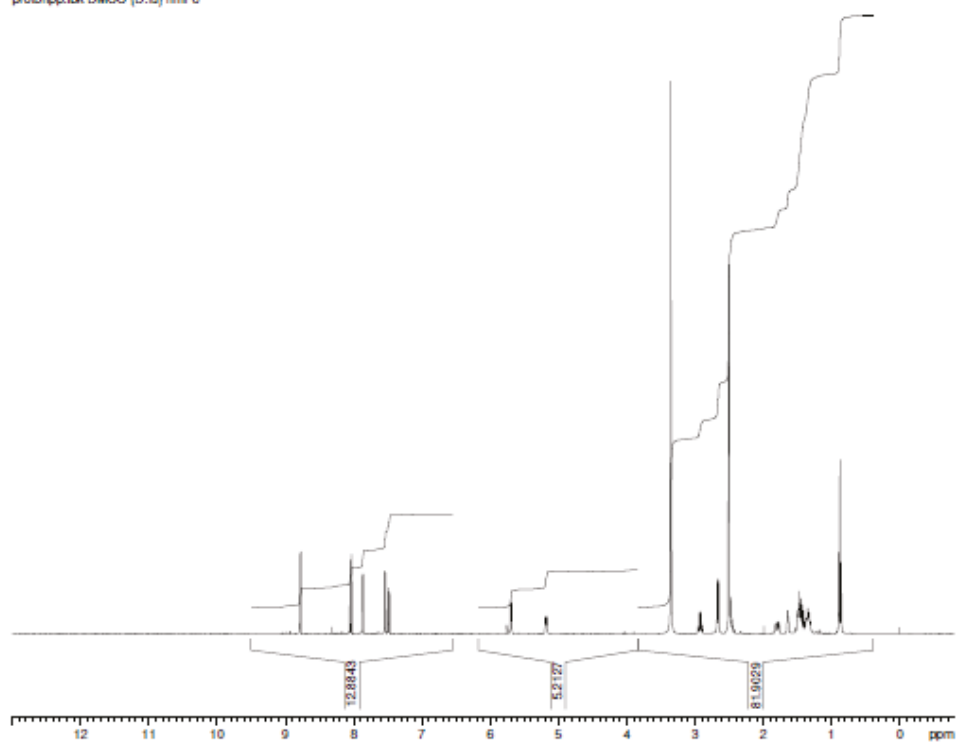

```
NAME      max44117.in
EXPNO     1
PROCNO    1
DATE_     20210408
TIME      21.23
INSTRUM    Av114400
PROBHD    5 mm WALTZ BB-
PULPROG    zgpg30
TD         65536
SOLVENT    DMSO
NS         64
DS         2
SWH        8223.085 K
F2AcqEs    5.125483 K
AQ         3.9846387 M
RG         128
WM         60.000 U
QE         6.50 U
TE         297.1 K
SI         1.20000000 M
TD0        1
```

```
----- Channel f1 -----
NUC1       1H
P1         10.00 U
PL1        -4.00 dB
SFO1       400.4004124 M
SI         32768 M
SF         400.4002089 M
SR         8.19 K
WDM        DM
SFO        0
LH         0.00 K
GB         0
PC         1.40
T1p        13.000 P
T2p        -0.600 P
```

Exp. <sup>13</sup>C, CPD  
MatSci: CM 1979  
c1 Scpden.libk DMSO [D<sub>2</sub>O] nmr 6

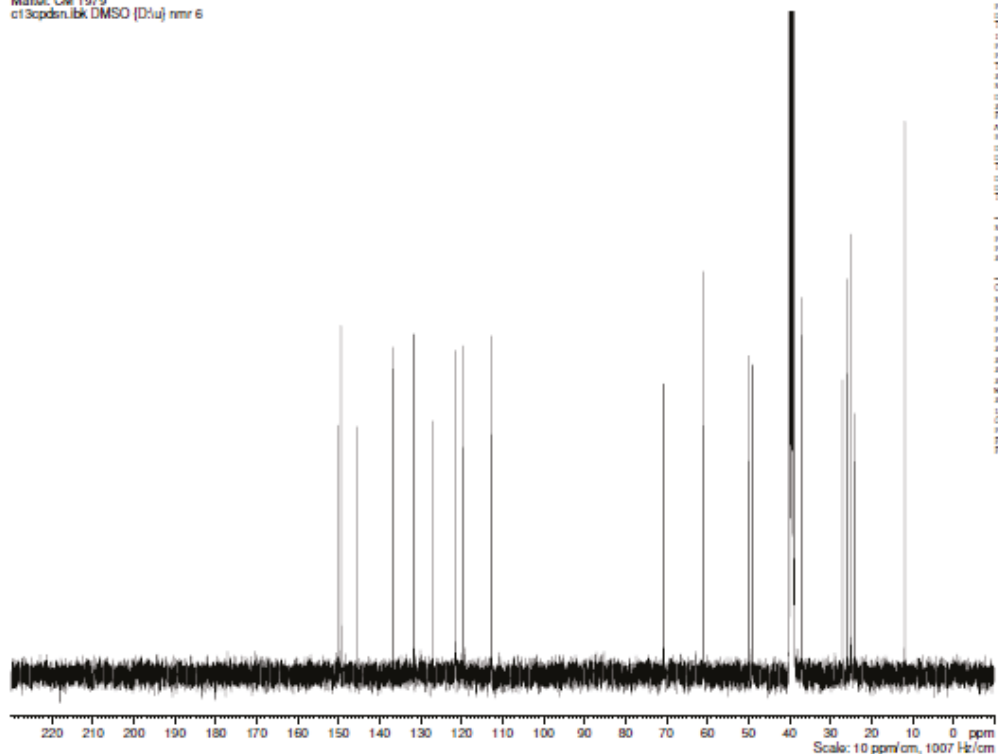

```
NAME      max44117.in
EXPNO     2
PROCNO    1
DATE_     20210408
TIME      21.32
INSTRUM    Av114400
PROBHD    5 mm WALTZ BB-
PULPROG    zgpg30
TD         131072
SOLVENT    DMSO
NS         960
DS         4
SWH        26315.789 K
F2AcqEs    5.200774 K
AQ         2.4904100 M
RG         400
WM         19.000 U
QE         6.50 U
TE         296.6 K
SI         2.00000000 M
TD0        0.00000000 M
```

```
----- Channel f1 13C -----
NUC1       13C
P1         8.00 U
PL1        -3.00 dB
SFO1       100.6018371 M

----- Channel f2 -----
CPDPRG2    waltz16
NUC2       1H
PCPD2      90.00 U
PL2        -4.00 dB
PL12       13.70 dB
PL13       14.00 dB
SFO2       400.4016516 M
SI         65536
SF         100.6007122 M
SR         51.18 K
WDM        DM
SFO        0
LH         1.00 K
GB         0
PC         1.40
T1p        230.000 P
T2p        -10.000 P
```

<sup>1</sup>H- and <sup>13</sup>C-NMR experiment for (R)-(6-azidoquinolin-4-yl)((1S,2S,4S,5R)-5-ethylquinuclidin-2-yl)methanol (**11**):

Exp. <sup>1</sup>H  
 Metabol: CM1978  
 protonpp.libk DMSO [D<sub>2</sub>O] nmr 6

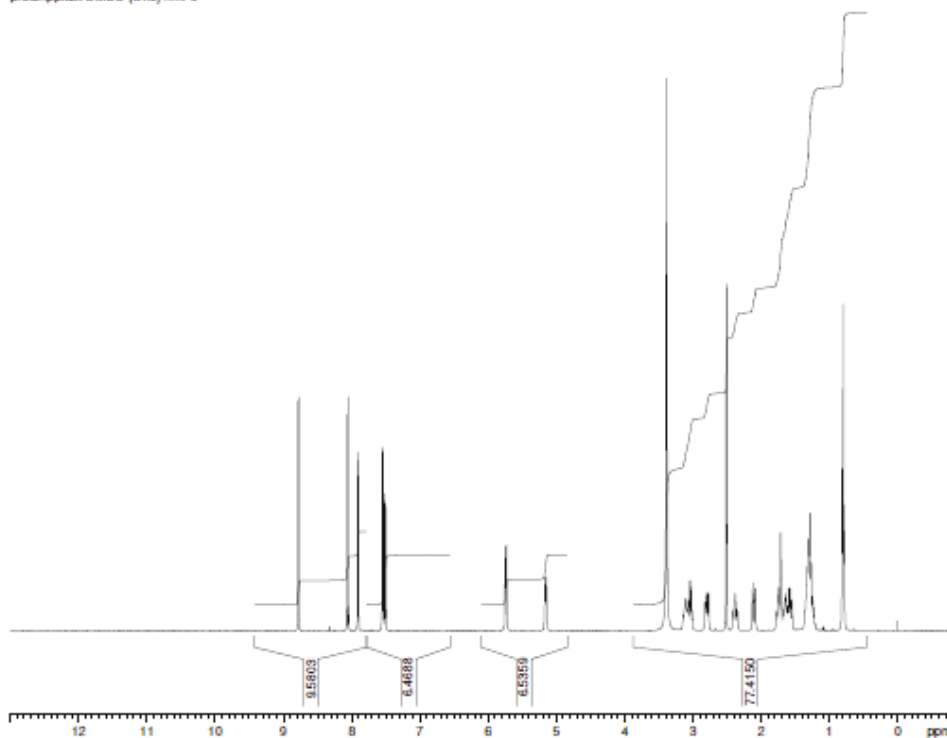

```
NAME      max144051.in
EXPNO     1
PROCNO    1
SOLAR     20210401
TIME      14.45
INSTRUM    AV11400
PULPROG    5 mm WALTZ16
TD         65536
SOLVENT    DMSO
NS         64
DS         2
SWH         8223.000 MHz
FIDRES     0.125483 MHz
AQ         3.9846387 MHz
RG         512.0
SM         65.000 u
SE         6.50 u
TE         300.1 K
SI         1.00000000 MHz
TSD        1
```

---

```
----- Channel f1 -----
NUC1       1H
P1         10.20 u
PL1        4.00 dB
SFO1       400.4004704 MHz
SI         32768
SF         400.4004704 MHz
SD         1.64 MHz
WDW         EM
SSB         0
LB         0.00 MHz
GB         0
PC         1.40
P1P        13.000 p
P2P        -0.000 p
```

Exp. <sup>13</sup>C, CPD  
 Metabol: CM1978  
 c13cpdpp.libk DMSO [D<sub>2</sub>O] nmr 6

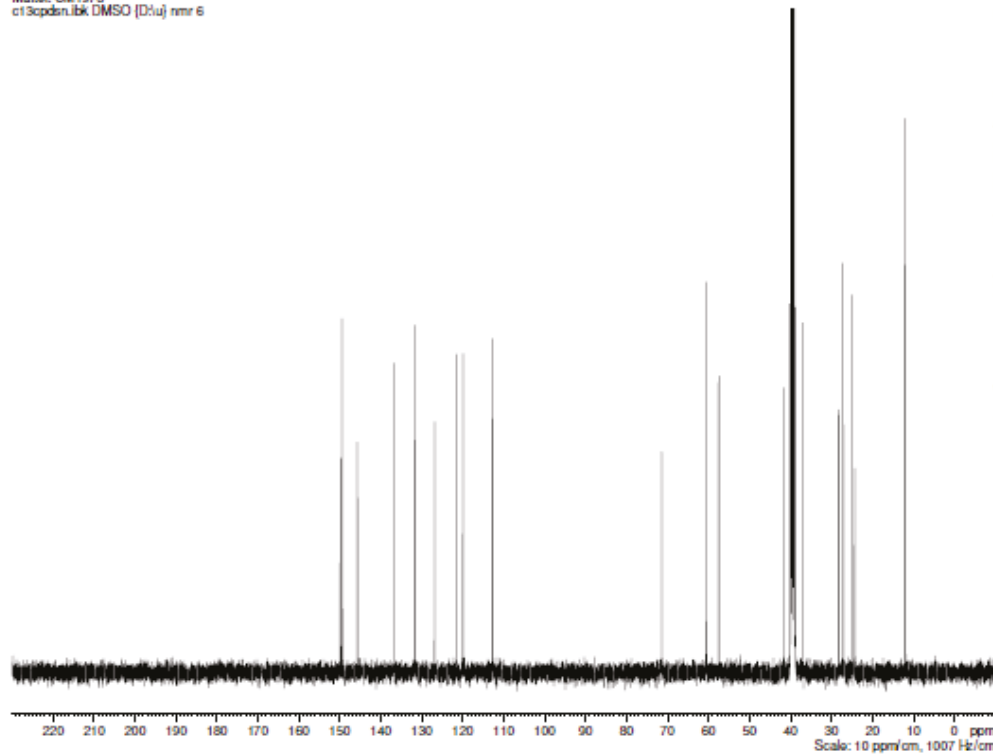

```
NAME      max144051.in
EXPNO     2
PROCNO    1
SOLAR     20210401
TIME      14.54
INSTRUM    AV11400
PULPROG    5 mm WALTZ16
TD         65536
SOLVENT    DMSO
NS         64
DS         4
SWH         26315.789 MHz
FIDRES     0.203774 MHz
AQ         2.4904180 MHz
RG         575
SM         18.000 u
SE         6.50 u
TE         298.4 K
SI         2.00000000 MHz
SII        0.03000000 MHz
TSD        10
```

---

```
----- Channel f1 -----
NUC1       13C
P1         8.95 u
PL1        1.00 dB
SFO1       100.6261271 MHz
```

---

```
----- Channel f2 -----
CPDPRG2    waltz16
NUC2       1H
PCPD2      80.00 u
PL2        4.00 dB
PL12       13.78 dB
PL13       14.00 dB
SFO2       400.4014014 MHz
SI         65536
SF         100.6261271 MHz
SD         48.57 MHz
WDW         EM
SSB         0
LB         1.00 MHz
GB         0
PC         1.40
P1P        230.000 p
P2P        -10.000 p
```

<sup>1</sup>H- and <sup>13</sup>C-NMR experiment for (S)-(6-azidoquinolin-4-yl)((1S,2R,4S,5S)-5-ethynylquinuclidin-2-yl)methanol (**12**):

Exp. <sup>1</sup>H  
Mafac CM 1994  
protonopp.bk CDC13 [D<sub>2</sub>O] nmr 11

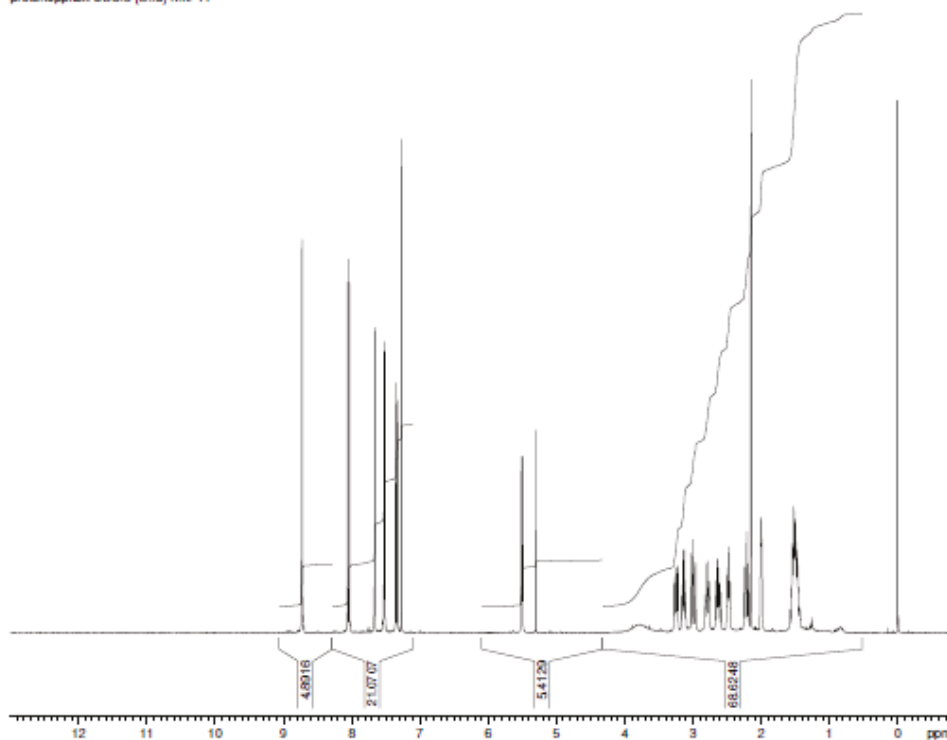

NAME max144208\_in  
ExpNo 1  
ProcNo 1  
Date 20210423  
Time 21.54  
INSTRUM AVI1400  
PROBHD 5 mm HANCO BB-  
PULPROG zgpg30  
TD 65536  
TE 300.13  
SOLVENT CDCl3  
NS 4  
DS 2  
SWH 8223.000 MHz  
FIDRES 0.1254803 MHz  
AQ 3.9946387 s  
RG 181  
WM 40.000 u  
WE 6.50 u  
TE 299.6 K  
SI 1.00000000 MHz  
TSD 1

Channel f1  
NUC1 1H  
P1 10.20 u  
PL1 4.00 dB  
AF1 400.4004716 MHz  
Z 32768  
SF 400.4005179 MHz  
AN 17.88 MHz  
WIN 0  
XPR 0  
LB 0  
GB 0  
PC 1.40  
FIR 13.000 p  
F2P -0.000 p

Exp. <sup>13</sup>C CPD  
Mafac CM 1994  
c13cpdnu.bk CDC13 [D<sub>2</sub>O] nmr 11

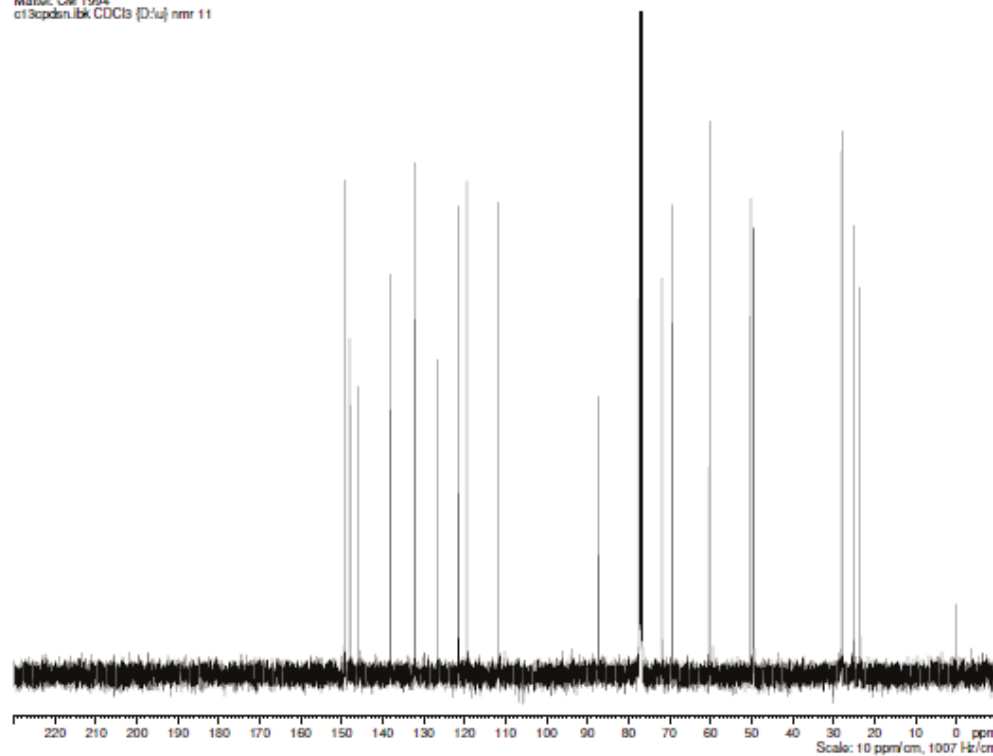

NAME max144208\_in  
ExpNo 2  
ProcNo 1  
Date 20210423  
Time 22.03  
INSTRUM AVI1400  
PROBHD 5 mm HANCO BB-  
PULPROG zgpg30  
TD 131072  
TE 300.13  
SOLVENT CDCl3  
NS 4  
DS 4  
SWH 26315.789 MHz  
FIDRES 0.203774 MHz  
AQ 2.4904180 s  
RG 1030  
WM 19.000 u  
WE 6.50 u  
TE 299.6 K  
SI 2.00000000 MHz  
TSD 10

Channel f1  
NUC1 13C  
P1 8.95 u  
PL1 2.00 dB  
AF1 100.6261271 MHz

Channel f2  
NAME max144208\_in  
ExpNo 2  
ProcNo 1  
Date 20210423  
Time 22.03  
INSTRUM AVI1400  
PROBHD 5 mm HANCO BB-  
PULPROG zgpg30  
TD 65536  
TE 300.13  
SOLVENT CDCl3  
NS 4  
DS 4  
SWH 26315.789 MHz  
FIDRES 0.203774 MHz  
AQ 2.4904180 s  
RG 1030  
WM 19.000 u  
WE 6.50 u  
TE 299.6 K  
SI 2.00000000 MHz  
TSD 10

<sup>1</sup>H- and <sup>13</sup>C-NMR experiment for (S)-(6-(4-(trimethylsilyl)-1H-1,2,3-triazol-1-yl)quinolin-4-yl)((1S,2R,4S,5R)-5-vinylquinuclidin-2-yl)methanol (**14**):

no. of the sticker on the nmr tube 604  
color of the label blue  
workgroup Nada  
Cup3-Triazol-SiMe3; CM 1991  
protonapp\_libk\_35 CDCl3 [D1u] tth 30

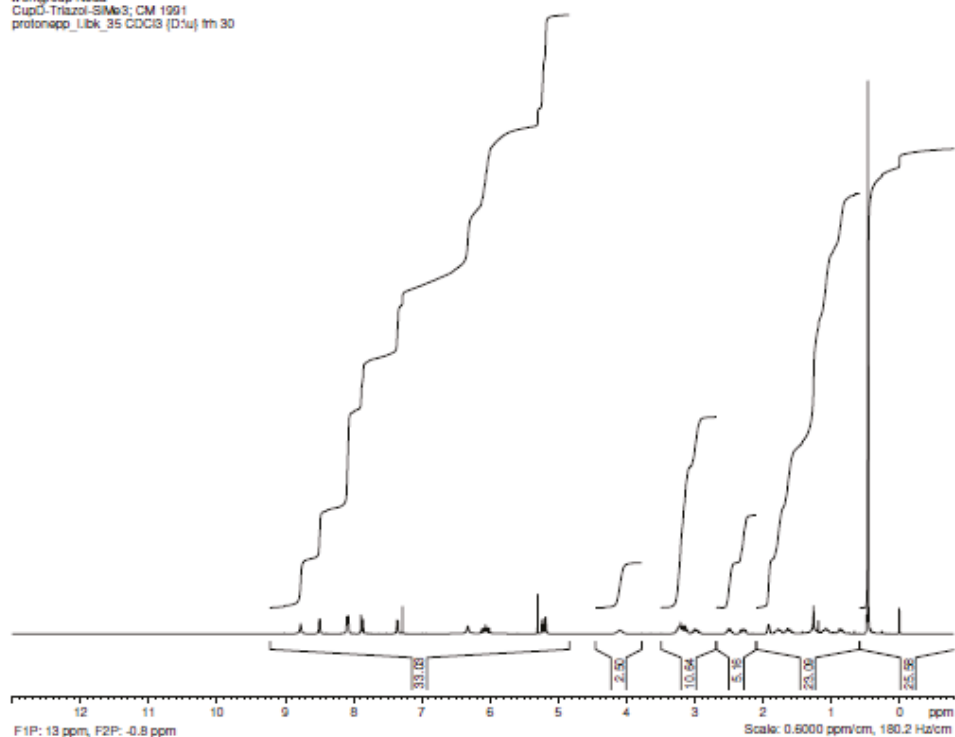

Current data parameters  
NAME fth-210420-184541.in  
Expt 1  
ProcCh 1  
F2 - Acquisition parameters  
Date\_ 20210420  
Time 19.15 h  
InstName AVI1000300M  
Proces 2104275\_0359  
PulsePrG zgpg30  
TO 891.3  
AcqReT CDCl3  
NU 128  
OR 2  
SW 6203.474 Hz  
FidRe 8.252420 Hz  
AQ 3.561551 sec  
RG 130.72  
DM 80.400 GHz  
DE 6.50 GHz  
TE 298.0 K  
SI 1.0000000 sec  
D1 1  
aFol 300.2618538 MHz  
NUC1 1H  
P0 6.50 GHz  
P1 12.50 GHz  
PLM1 10.85099883 W  
F2 - processing parameters  
SI 27168  
AF 300.2600075 MHz  
WDM 2M  
XDR 0  
LH 0 Hz  
CH 0  
PC 1.00

no. of the sticker on the nmr tube 604  
color of the label blue  
workgroup Nada  
Cup3-Triazol-SiMe3; CM 1991  
c13cpd\_mlibk\_35 CDCl3 [D1u] tth 30

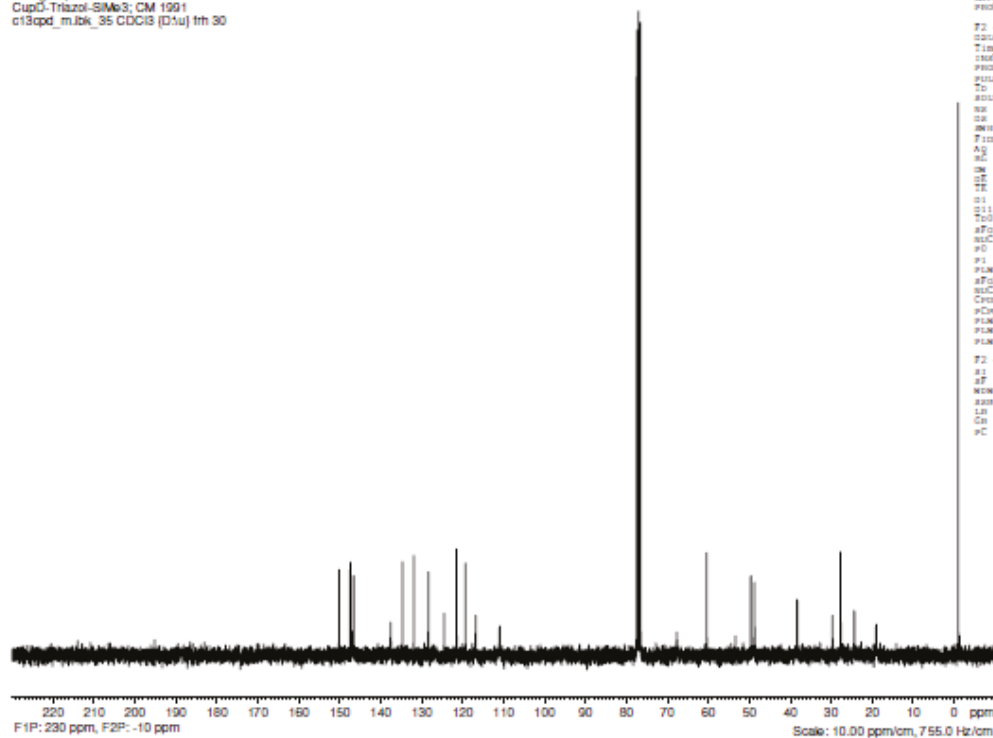

Current data parameters  
NAME fth-210420-184541.in  
Expt 2  
ProcCh 1  
F2 - Acquisition parameters  
Date\_ 20210420  
Time 19.40 h  
InstName AVI1000300M  
Proces 2104275\_0359  
PulsePrG zgpg30  
TO 891.3  
AcqReT CDCl3  
NU 384  
OR 4  
SW 19736.842 Hz  
FidRe 8.401547 Hz  
AQ 2.4903679 sec  
RG 18.42  
DM 25.333 GHz  
DE 6.50 GHz  
TE 298.0 K  
SI 2.0000000 sec  
D1 0.0300000 sec  
D11 1  
aFol 75.508871 MHz  
NUC1 13C  
P0 6.50 GHz  
P1 9.50 GHz  
PLM1 51.05799866 W  
aFol2 300.2618538 MHz  
NUC2 1H  
Chrmc[2] W101214  
PChm2 90.50 GHz  
PLM2 10.85099883 W  
PLM3 0.1020000 W  
PLM3 0.0070310 W  
F2 - processing parameters  
SI 65536  
AF 75.5004423 MHz  
WDM 2M  
XDR 0  
LH 1.00 Hz  
CH 0  
PC 1.40

<sup>1</sup>H- and <sup>13</sup>C-NMR experiment for (S)-6-(1H-1,2,3-triazol-1-yl)quinolin-4-yl)((1S,2R,4S,5R)-5-vinylquinuclidin-2-yl)methanol (**15**):

Kunde: Maffel  
Substanz-Code: CM 1991  
Exp. 1H  
protonapp.lib\_32 CDCB (D1u) nmr 10

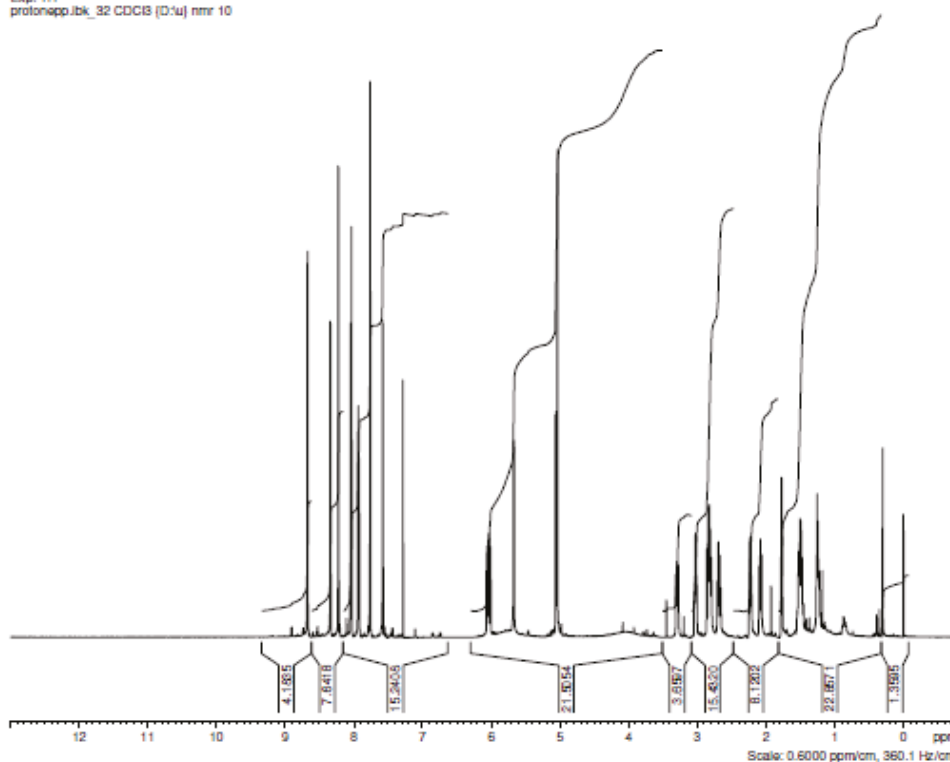

Current data parameters  
NAME: max144207.in  
EXPNO: 1  
PROCNO: 1

F2 - Acquisition parameters  
Date\_: 20210421  
Time: 16.03  
INSTRUM: spect  
PROBHD: 5 mm HMQB 50-  
PULPROG: zgpg30  
TD: 65536  
SOLVENT: CDCl3  
NS: 2048  
DS: 4  
SWH: 12335.526 Hz  
FIDRES: 0.125482 Hz  
AQ: 3.9840388 sec  
RG: 711.8  
WM: 40.523 umsec  
ZG: 6.50 umsec  
TE: 298.2 K  
SI: 2.00000000 sec  
TO: 1

Channel F1  
NUC1: 13C  
P1: 11.75 umsec  
PL1: 28.00000000 W

F2 - Processing parameters  
SI: 65536  
SF: 600.1300118 MHz  
WDW: EM  
SSB: 0  
LB: 0 Hz  
GB: 0 Hz  
PC: 1.40  
AP: 1.40 Hz  
SFOF: 0.188225 Hz

Kunde: Maffel  
Substanz-Code: CM 1991  
Exp. 13C-CPD  
c13cpd.lib\_32 CDCB (D1u) nmr 10

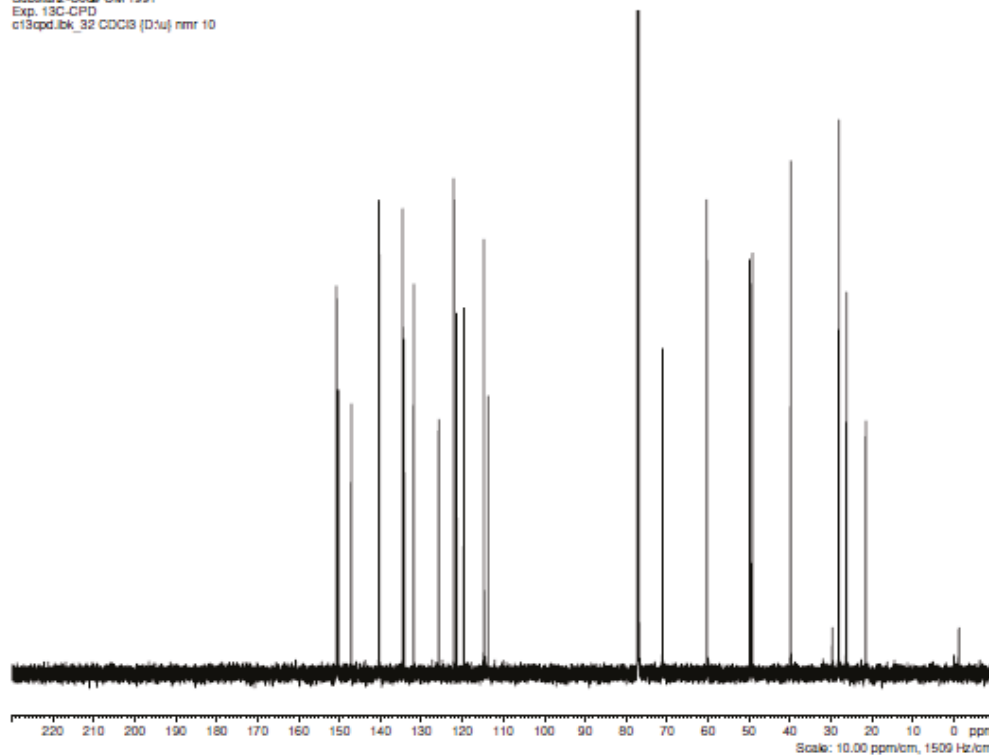

Current data parameters  
NAME: max144207.in  
EXPNO: 2  
PROCNO: 1

F2 - Acquisition parameters  
Date\_: 20210421  
Time: 16.05  
INSTRUM: spect  
PROBHD: 5 mm HMQB 50-  
PULPROG: zgpg30  
TD: 65536  
SOLVENT: CDCl3  
NS: 2048  
DS: 4  
SWH: 39482.535 Hz  
FIDRES: 0.201834 Hz  
AQ: 2.4712408 sec  
RG: 205.0  
WM: 12.600 umsec  
ZG: 6.50 umsec  
TE: 298.2 K  
SI: 2.00000000 sec  
TO: 1

Channel F1  
NUC1: 13C  
P1: 10.40 umsec  
PL1: 50.00000000 W

Channel F2  
NUC2: 1H  
CPDPRG2: waltz16  
PCPD2: 70.00 umsec  
PL12: 28.00000000 W  
PL13: 0.78860000 W  
PL14: 0.36680999 W

F2 - Processing parameters  
SI: 131072  
SF: 150.9628231 MHz  
WDW: EM  
SSB: 0  
LB: 1.00 Hz  
GB: 0 Hz  
PC: 1.40  
AP: 14.41 Hz  
SFOF: 0.362754 Hz



<sup>1</sup>H- and <sup>13</sup>C-NMR experiment for (R)-(6-(4-(trimethylsilyl)-1H-1,2,3-triazol-1-yl)quinolin-4-yl)((1S,2S,4S,5R)-5-vinylquinuclidin-2-yl)methanol (**16**):

no. of the sticker on the nmr tube 684  
color of the label blue  
workgroup Nada  
CUP-Triazol-SiMe3; CM 1984  
protonpp.lib, 35 CDCIS (D1u) 1h 16

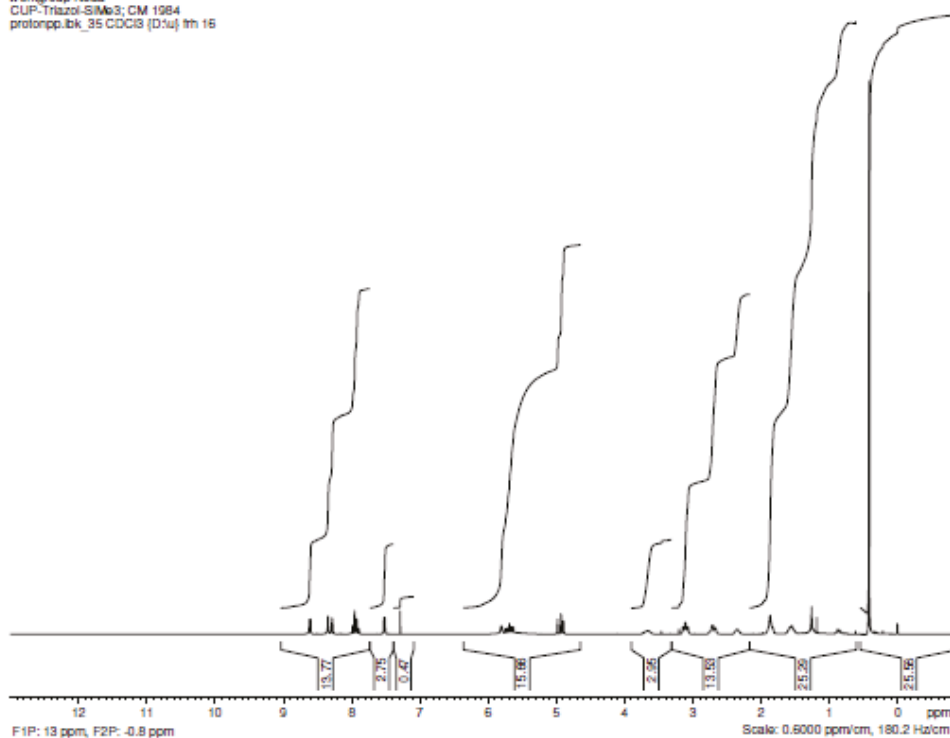

Current data parameters  
NAME fcs-210423-145407\_in  
Expno 1  
ProcNo 1  
F2 - Acquisition parameters  
Date\_ 20210423  
Time 21.40 h  
InstName Axiom300m  
Proces 210423\_0369  
PulprogC zg30  
TD 65536  
AcqInT CDCIS  
NS 24  
DS 2  
SWH 6203.474 Hz  
Fwhm 8.252420 Hz  
AQ 3.901641 sec  
RG 89.15  
DM 80.400 GHz  
DE 6.50 GHz  
TE 298.0 K  
Z1 1.0000000 sec  
ZD 1  
aF01 300.2615138 MHz  
NUC1 1H  
P0 6.00 GHz  
P1 12.00 GHz  
PLM1 10.8509983 W  
F2 - Processing parameters  
SI 32768  
aF 300.2600461 MHz  
WDM 2M  
SFO 0  
LB 0 Hz  
GB 0  
PC 1.00

no. of the sticker on the nmr tube 684  
color of the label blue  
workgroup Nada  
CUP-Triazol-SiMe3; CM 1984  
c13cpd.lib, 35 CDCIS (D1u) 1h 16

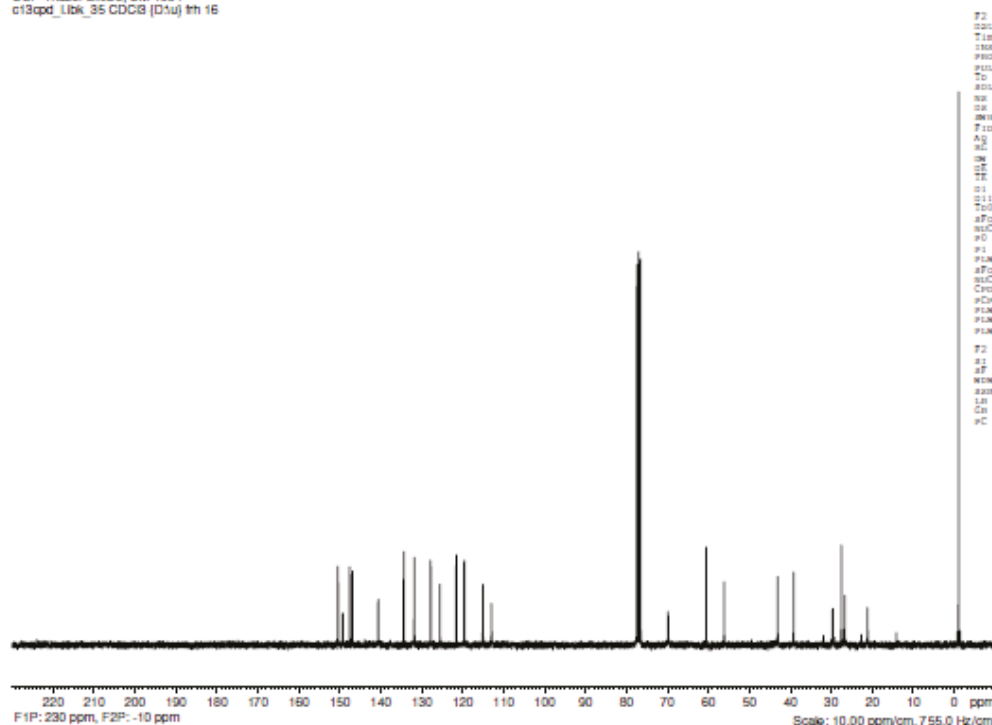

Current data parameters  
NAME fcs-210423-145407\_in  
Expno 2  
ProcNo 1  
F2 - Acquisition parameters  
Date\_ 20210423  
Time 22.24 h  
InstName Axiom300m  
Proces 210423\_0369  
PulprogC zgpg30  
TD 65536  
AcqInT CDCIS  
NS 4  
DS 4  
SWH 19736.842 Hz  
Fwhm 8.401547 Hz  
AQ 2.4903479 sec  
RG 20.18  
DM 25.333 GHz  
DE 6.50 GHz  
TE 298.0 K  
Z1 2.0000000 sec  
ZD 1  
aF01 75.508811 MHz  
NUC1 13C  
P0 3.57 GHz  
P1 51.0579864 W  
aF02 300.2612910 MHz  
NUC2 1H  
CoupPC[2] W101216  
PCou2 90.00 GHz  
PLM2 10.8509983 W  
PLM1 0.16296350 W  
PLM3 0.00703100 W  
F2 - Processing parameters  
SI 65536  
aF 75.5084433 MHz  
WDM 2M  
SFO 0  
LB 1.00 Hz  
GB 0  
PC 1.40

<sup>1</sup>H- and <sup>13</sup>C-NMR experiment for (R)-(6-(1H-1,2,3-triazol-1-yl)quinolin-4-yl)((1S,2S,4S,5R)-5-vinylquinuclidin-2-yl)methanol (**17**):

Exp. <sup>1</sup>H  
Metho: CM-1984-Triaz-H  
protonppb.bk CDCl<sub>3</sub> [D<sub>2</sub>O] nmr 3

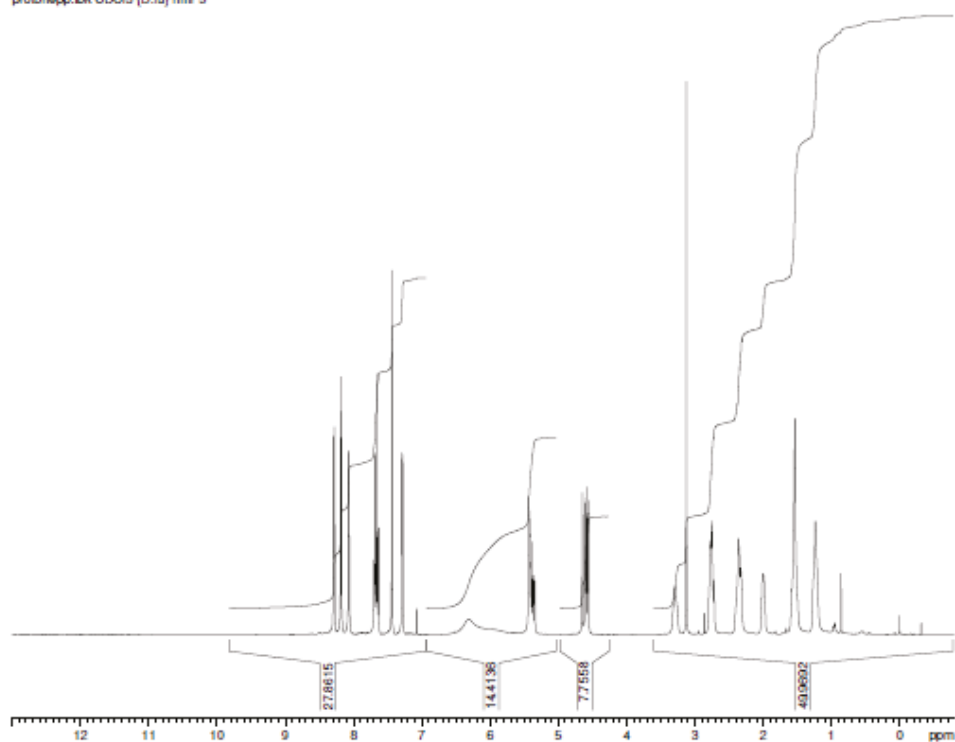

```

NAME      max:44244.in
EXPNO     1
PROCNO    1
DATE_     20210426
TIME      14.58
INSTRUM    AVI1400
PROBHD     5 mm HANCO H-
PULPROG    zgpg30
TD         65536
SOLVENT    CDCl3
NS         64
DS         2
SWH         8223.485 Hz
FIDRES     0.121483 Hz
AQ         3.9846387 s
RG         14
WM         60.800 u
GB         0.50 u
TE         298.0 K
SI         1.00000000 M
TO        1.00000000 M
  
```

```

----- Channel f1 -----
NUC1       1H
P1         10.00 u
PC1        4.00 dB
AF1        400.4004000 MHz
SI         32768
SF         400.4009400 MHz
WDW        EM
SSB         0
LB         0.00 Hz
GB         0
PC         1.40
T1P        13.000 p
F2P        -0.800 p
  
```

Exp. <sup>13</sup>C CPD  
Metho: CM-1984-Triaz-H  
c13cpdppb.bk CDCl<sub>3</sub> [D<sub>2</sub>O] nmr 3

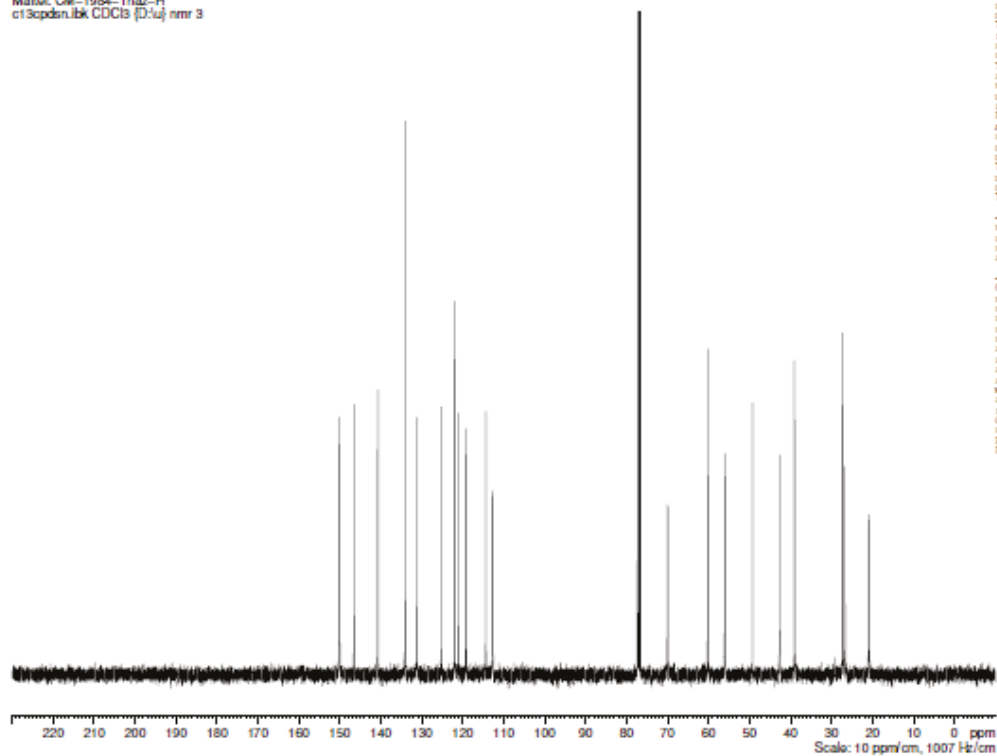

```

NAME      max:44244.in
EXPNO     2
PROCNO    1
DATE_     20210426
TIME      15.08
INSTRUM    AVI1400
PROBHD     5 mm HANCO H-
PULPROG    zgpg30
TD         131072
SOLVENT    CDCl3
NS         96
DS         4
SWH         26315.789 Hz
FIDRES     0.2007774 Hz
AQ         2.4804180 s
RG         2050
WM         19.000 u
GB         0.50 u
TE         298.2 K
SI         2.00000000 M
TO        0.00000000 M
  
```

```

----- Channel f1 -----
NUC1       13C
P1         8.95 u
PC1        3.00 dB
AF1        100.6261371 MHz
  
```

```

----- Channel f2 -----
NAME      max:44244.in
EXPNO     2
PROCNO    1
DATE_     20210426
TIME      15.08
INSTRUM    AVI1400
PROBHD     5 mm HANCO H-
PULPROG    zgpg30
TD         131072
SOLVENT    CDCl3
NS         96
DS         4
SWH         26315.789 Hz
FIDRES     0.2007774 Hz
AQ         2.4804180 s
RG         2050
WM         19.000 u
GB         0.50 u
TE         298.2 K
SI         2.00000000 M
TO        0.00000000 M
  
```

<sup>1</sup>H- and <sup>13</sup>C-NMR experiment for (S)-(6-(4-(trimethylsilyl)-1H-1,2,3-triazol-1-yl)quinolin-4-yl)((1S,2R,4S,5R)-5-ethylquinuclidin-2-yl)methanol (**18**):

no. of the sticker on the nmr tube 288

color of the label blue

workgroup Neda

CM 1929a; Dihydrocupreidine-Triazole-trimethylsilyl (DH-CupD-T-SiMe3)

protonp.bk\_35 CDCl3 [D1u] tth 18

Current data parameters  
NAME fth-210521-162000\_in  
Exptno 1  
ProcNo 1

F2 - Acquisition parameters  
Date\_ 20210521  
Time 21.26 h  
INSTRUM AV1000300H  
PROBHD z104275\_0309 (1  
PULPROG zgpg30  
TD 65536  
SOLVENT CDCl3  
NS 24  
DS 2  
SWH 6203.474 Hz  
FIDRES 0.252420 Hz  
AQ 3.3615611 sec  
RG 80.22  
CW 80.400 GHz  
DE 6.50 GHz  
TE 298.0 K  
SI 1.0000000 sec  
TDO 1  
SFO1 300.2618513 MHz  
NUC1 1H  
P0 4.00 GHz  
P1 12.50 GHz  
PLM1 10.85099983 W

F2 - processing parameters  
SI 32768  
SF 300.2600028 MHz  
WDW EM  
SSB 0  
LB 0 Hz  
GB 0  
PC 1.00

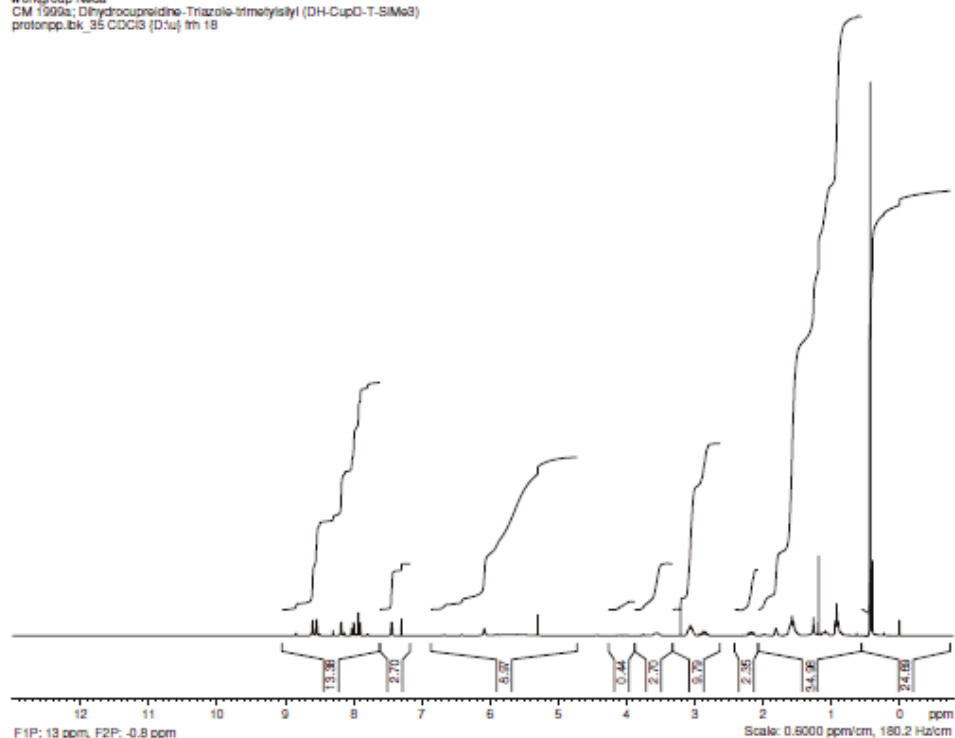

no. of the sticker on the nmr tube 288

color of the label blue

workgroup Neda

CM 1929a; Dihydrocupreidine-Triazole-trimethylsilyl (DH-CupD-T-SiMe3)

c13cpd\_mibk\_35 CDCl3 [D1u] tth 18

Current data parameters  
NAME fth-210521-162000\_in  
Exptno 2  
ProcNo 1

F2 - Acquisition parameters  
Date\_ 20210521  
Time 21.50 h  
INSTRUM AV1000300H  
PROBHD z104275\_0309 (1  
PULPROG zgpg30  
TD 65536  
SOLVENT CDCl3  
NS 304  
DS 4  
SWH 19736.842 Hz  
FIDRES 0.401547 Hz  
AQ 2.4903679 sec  
RG 18.42  
CW 25.333 GHz  
DE 6.50 GHz  
TE 298.0 K  
SI 2.0000000 sec  
TDO 1  
SFO1 75.508171 MHz  
NUC1 13C  
P0 5.17 GHz  
P1 9.50 GHz  
PLM1 51.05799846 W  
SFO2 300.2618513 MHz  
NUC2 1H  
PLM2 10.85099983 W  
PLM3 0.10200000 W  
PLM4 0.50703100 W

F2 - processing parameters  
SI 65536  
SF 75.5084441 MHz  
WDW EM  
SSB 0  
LB 1.00 Hz  
GB 0  
PC 1.40

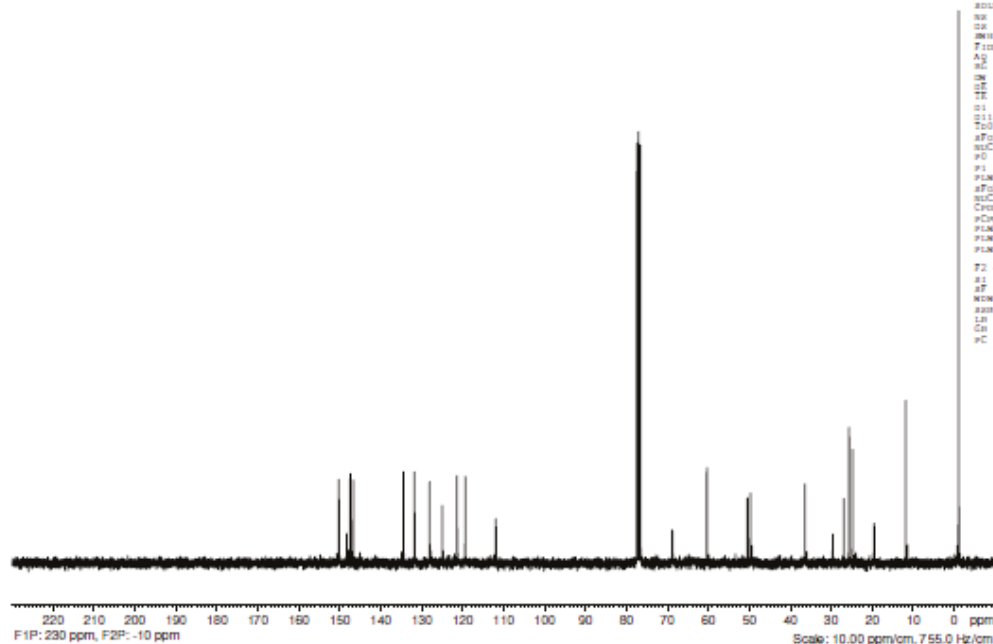

1H- and 13C-NMR experiment for (S)-(6-(1H-1,2,3-triazol-1-yl)quinolin-4-yl)((1S,2R,4S,5R)-5-ethylquinuclidin-2-yl)methanol (**19**):

no. of the sticker on the nmr tube 289  
color of the label blue  
workgroup Nada  
CM 1999b; Dihydrocupreidine-Triazole-hydrogene (DH-CupD-T-H  
protonpp.lib 35 CDCI3 (D<sub>2</sub>O) frh 19

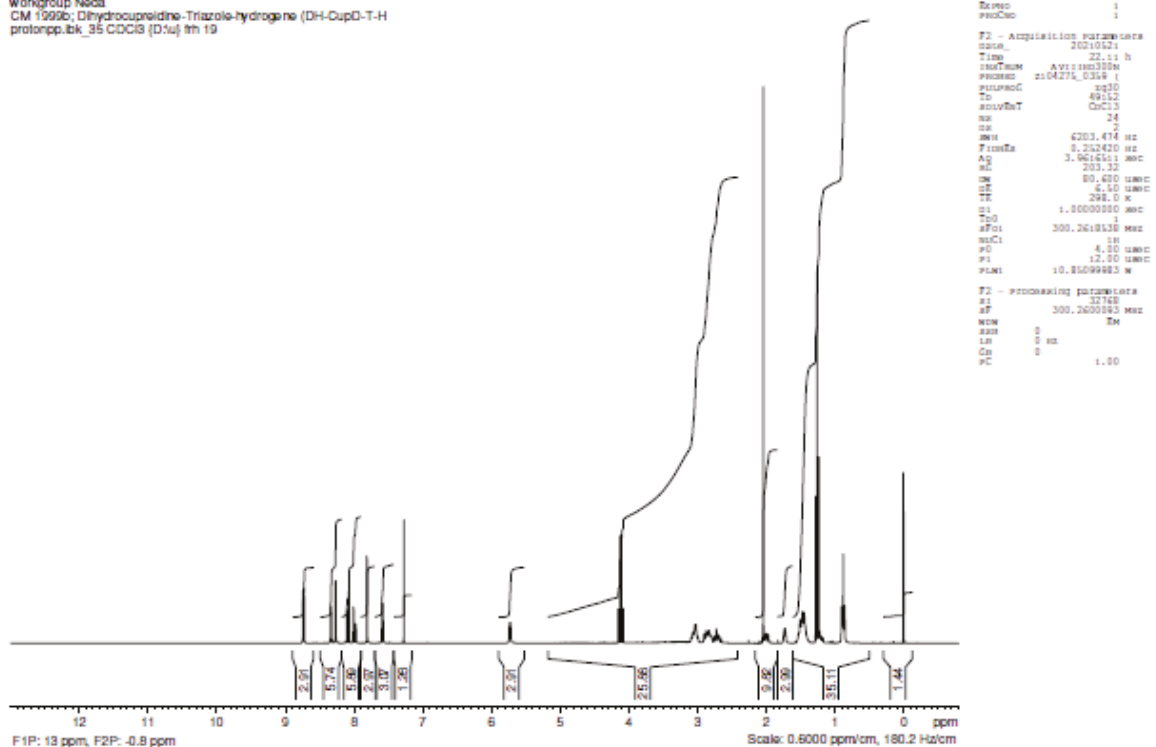

no. of the sticker on the nmr tube 289  
color of the label blue  
workgroup Nada  
CM 1999b; Dihydrocupreidine-Triazole-hydrogene (DH-CupD-T-H  
c13cpd Libk 35 CDCB (D5u) trh 19

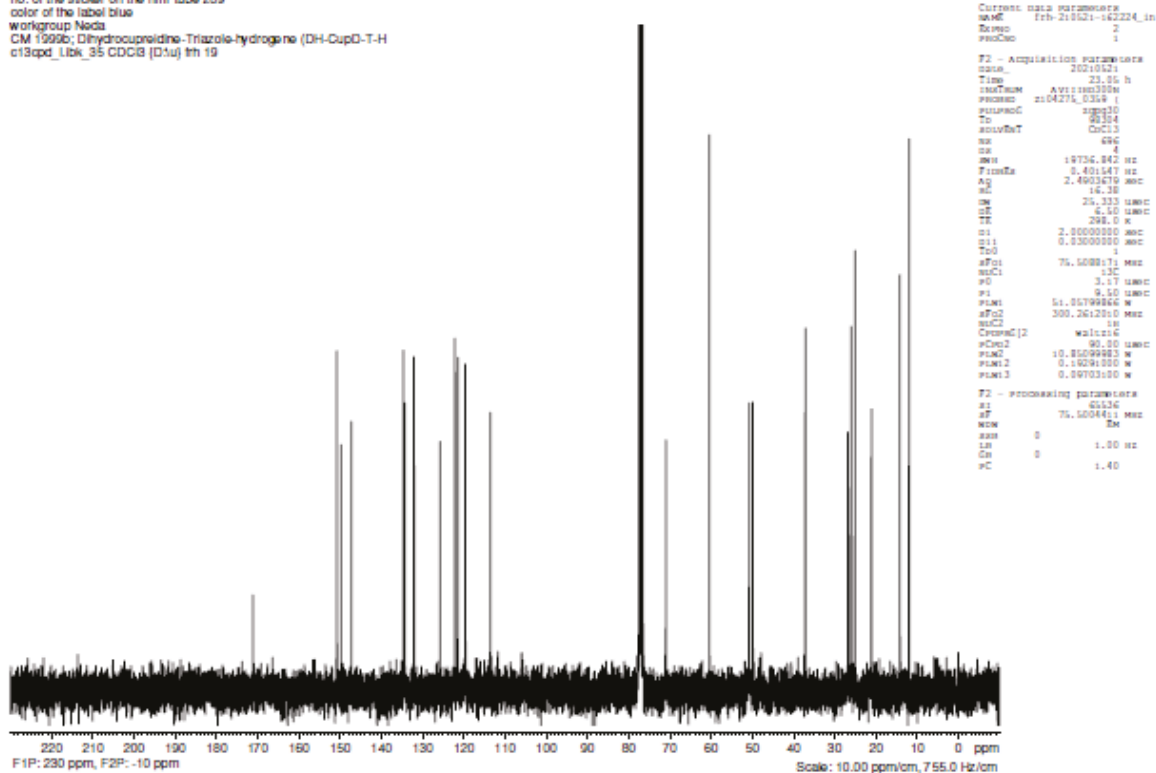

<sup>1</sup>H- and <sup>13</sup>C-NMR experiment for (R)-(6-(4-(trimethylsilyl)-1H-1,2,3-triazol-1-yl)quinolin-4-yl)((1S,2S,4S,5R)-5-ethylquinuclidin-2-yl)methanol (**20**):

no. of the sticker on the nmr tube 605  
color of the label blue  
workgroup Neda  
DH-CuUP-Triazol-SiMe3; CM 1997  
protonapp\_1.tbk\_35 CDCl<sub>3</sub> [D<sub>2</sub>O] 1h 31

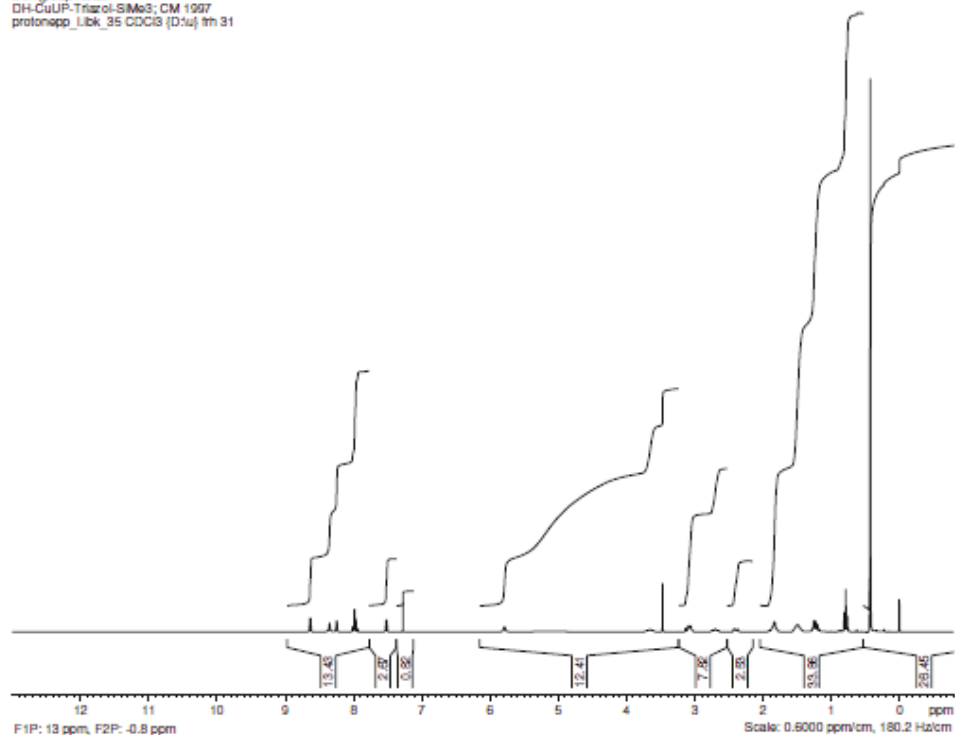

no. of the sticker on the nmr tube 605  
color of the label blue  
workgroup Neda  
DH-CuUP-Triazol-SiMe3; CM 1997  
c13cpd\_m.tbk\_35 CDCl<sub>3</sub> [D<sub>2</sub>O] 1h 31

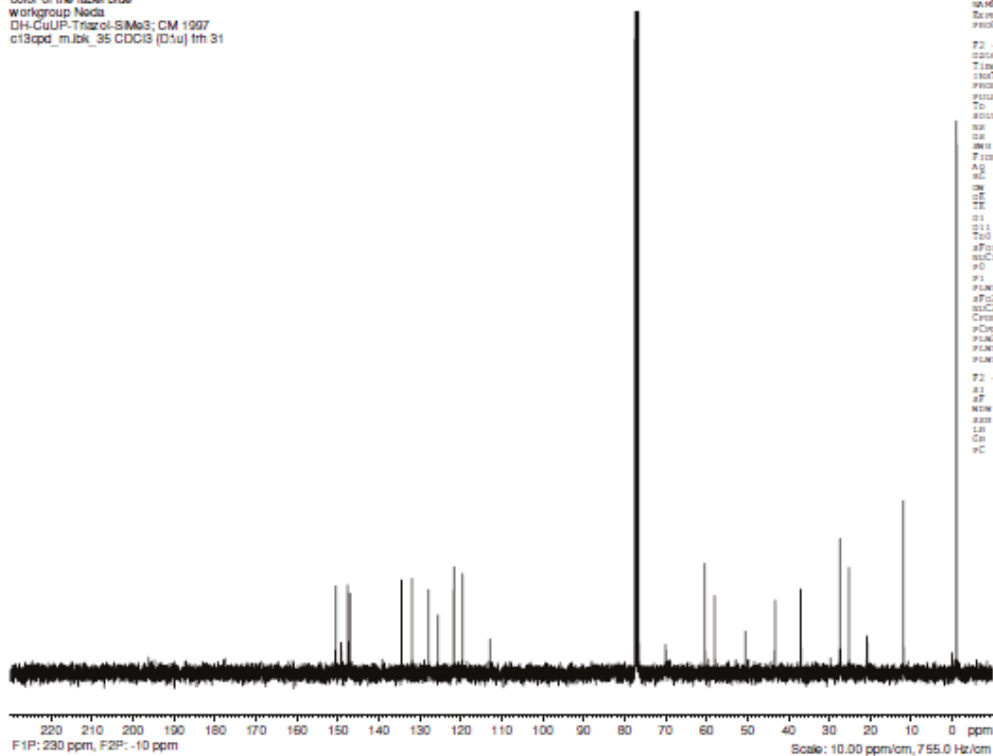

<sup>1</sup>H- and <sup>13</sup>C-NMR experiment for (R)-(6-(1H-1,2,3-triazol-1-yl)quinolin-4-yl)((1S,2S,4S,5R)-5-ethylquinuclidin-2-yl)methanol (**21**):

no. of the sticker on the nmr tube 568  
color of the label blue  
workgroup Nada  
DH-CUP-Triazol-H, CM 1997  
protompp.lib\_35 CDCl<sub>3</sub> [D<sub>2</sub>O] 1th 39

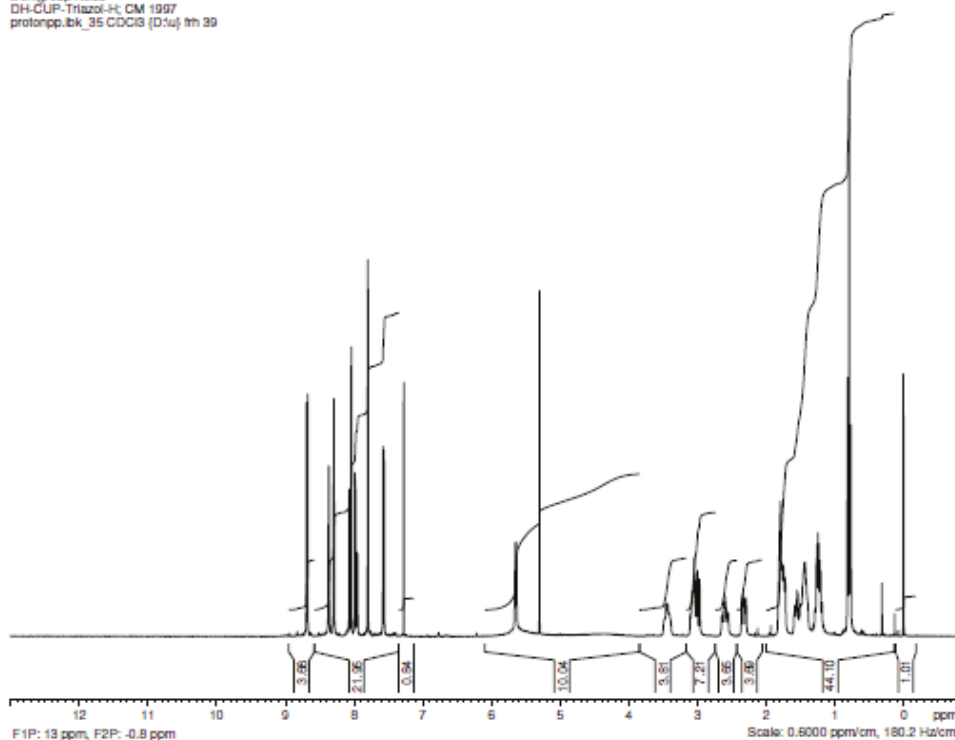

Current data parameters  
NAME fth-210419-175221\_in  
Date\_ 1  
ProcDate 1  
F2 - Acquisition parameters  
Date\_ 20210419  
Time 22:12 h  
INSTRUM AVI100300m  
PROBHD z104275\_0304\_1  
PULPROG zgpg30  
TD 49152  
SOLVENT CDCl<sub>3</sub>  
NS 24  
DS 2  
SWH 6203.474 Hz  
FIDRES 0.262420 Hz  
AQ 3.961651 sec  
RG 166.74  
DM 80.000 sec  
DE 6.50 sec  
TE 298.0 K  
D1 1.0000000 sec  
TDO 1  
aF01 300.2618136 MHz  
NUC1 13C  
P0 6.00 sec  
P1 12.00 sec  
PLM1 10.8509983 W  
F2 - processing parameters  
SI 32768  
SF 300.260084 MHz  
WDW EM  
SSB 0  
LB 0 Hz  
GB 0  
PC 1.00

no. of the sticker on the nmr tube 568  
color of the label blue  
workgroup Nada  
DH-CUP-Triazol-H, CM 1997  
c13qpd\_mubi\_35 CDCl<sub>3</sub> [D<sub>2</sub>O] 1th 39

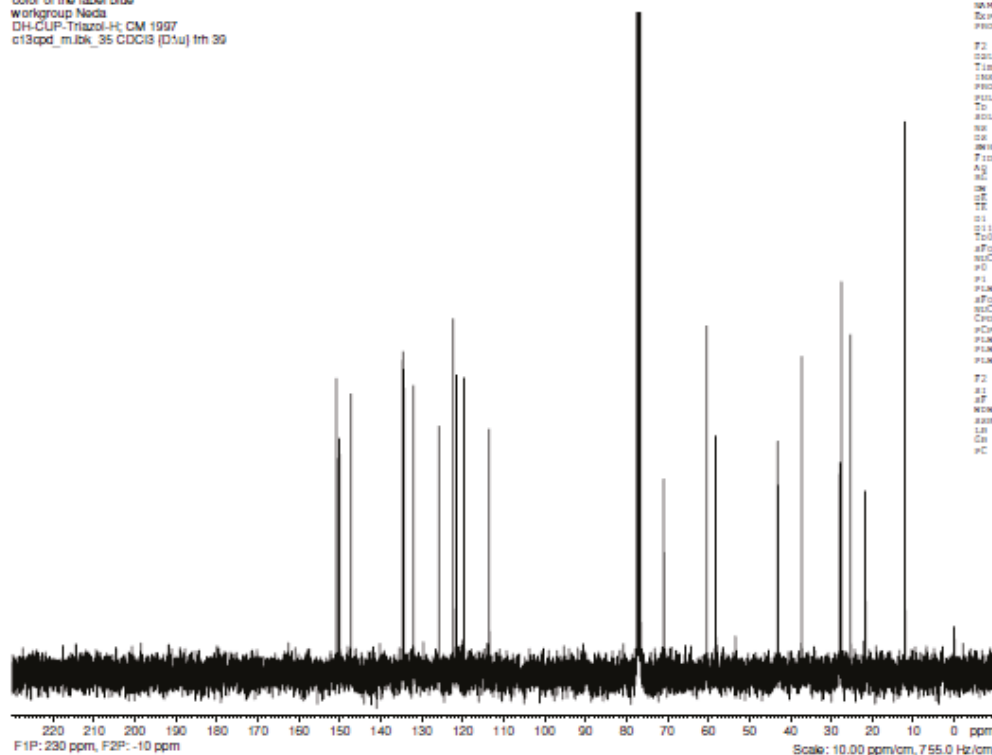

Current data parameters  
NAME fth-210419-175221\_in  
Date\_ 2  
ProcDate 1  
F2 - Acquisition parameters  
Date\_ 20210419  
Time 22:14 h  
INSTRUM AVI100300m  
PROBHD z104275\_0304\_1  
PULPROG zgpg30  
TD 65104  
SOLVENT CDCl<sub>3</sub>  
NS 4  
DS 4  
SWH 19736.842 Hz  
FIDRES 0.401547 Hz  
AQ 2.490361 sec  
RG 16.38  
DM 25.333 sec  
DE 6.50 sec  
TE 298.0 K  
D1 2.0000000 sec  
D11 0.3300000 sec  
TDO 1  
aF01 75.5088171 MHz  
NUC1 13C  
P0 3.17 sec  
P1 9.50 sec  
PLM1 51.0579984 W  
aF02 300.2612010 MHz  
NUC2 1H  
CHPAC[2] waltz16  
aF03 90.00 sec  
PLM2 10.8509983 W  
PLM3 0.1829100 W  
PLM4 0.0070300 W  
F2 - processing parameters  
SI 65536  
SF 75.508821 MHz  
WDW EM  
SSB 0  
LB 1.00 Hz  
GB 0  
PC 1.40

<sup>1</sup>H- and <sup>13</sup>C-NMR experiment for (S)-6-(4-((1S,3R,4S,6R)-6-(hydroxymethyl)quinuclidin-3-yl)-1H-1,2,3-triazol-1-yl)quinolin-4-yl)((1S,2R,4S,5R)-5-vinylquinuclidin-2-yl)methanol (**24**):

no. of the sticker on the nmr tube 213  
color of the label blue  
workgroup Neda  
CM 1981; Cupridine-Triazole-Quinoridine (CupD-T-QCD)  
protonapp\_lib\_35 CDCl<sub>3</sub> [D<sub>2</sub>O] 1h 27

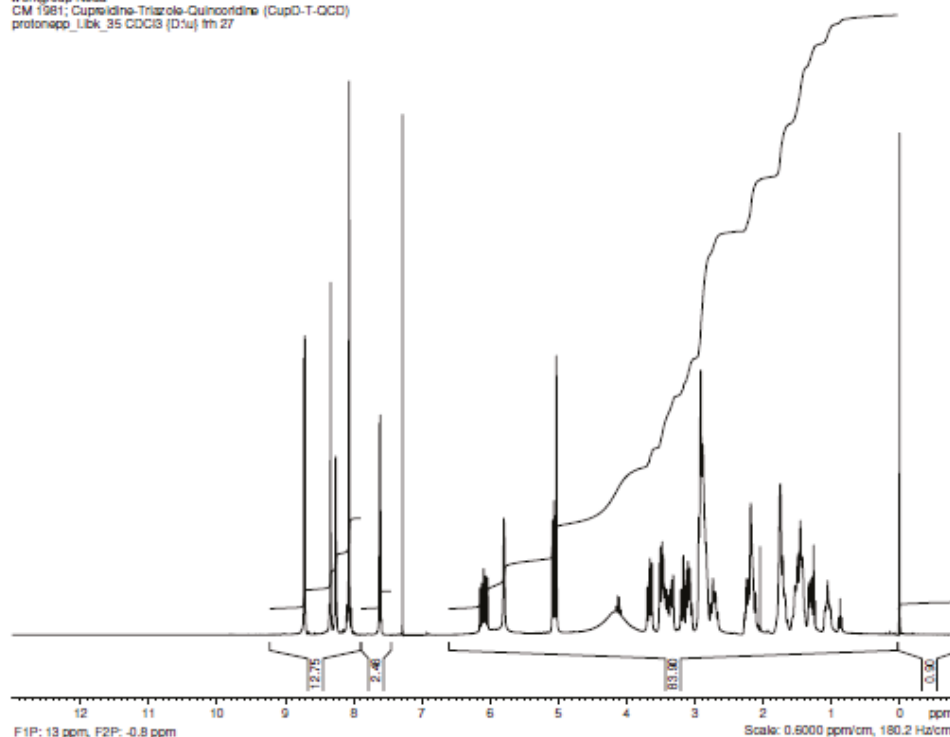

Current data parameters  
NAME fdb-210618-171008\_in  
ExptNo 1  
ProcNo 1  
F2 - Acquisition parameters  
Date\_ 20210518  
Time 23.24 h  
INSTRUM AVI1000300M  
PROBHD 2106276\_0304 1  
PULPROG zgpg30  
TD 65536  
SOLVENT CDCl<sub>3</sub>  
NS 128  
DS 2  
SWH 6203.474 Hz  
FIDRES 0.252420 Hz  
AQ 3.561551 sec  
RG 114.44  
WM 80.620 mmsec  
TE 298.0 K  
DE 1.0000000 sec  
D0 1  
dF01 300.2618138 MHz  
NUC1 1H  
P0 8.20 mmsec  
P1 12.20 mmsec  
PL1 10.85099883 W  
F2 - Processing parameters  
SI 32768  
SF 300.260074 MHz  
WDW EM  
SSB 0  
LB 0 Hz  
GB 0  
PC 1.00

no. of the sticker on the nmr tube 213  
color of the label blue  
workgroup Neda  
CM 1981; Cupridine-Triazole-Quinoridine (CupD-T-QCD)  
c13cpd\_mlib\_35 CDCl<sub>3</sub> [D<sub>2</sub>O] 1h 27

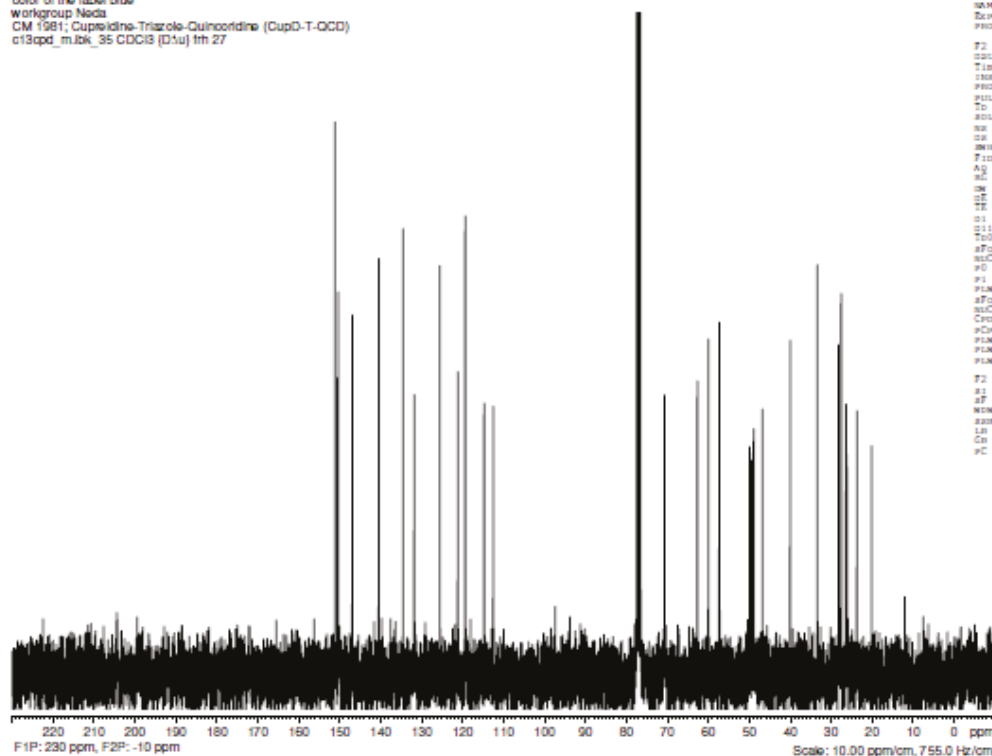

Current data parameters  
NAME fdb-210618-171008\_in  
ExptNo 2  
ProcNo 1  
F2 - Acquisition parameters  
Date\_ 20210518  
Time 23.49 h  
INSTRUM AVI1000300M  
PROBHD 2106276\_0304 1  
PULPROG zgpg30  
TD 65536  
SOLVENT CDCl<sub>3</sub>  
NS 304  
DS 4  
SWH 19736.842 Hz  
FIDRES 0.401647 Hz  
AQ 2.4603679 sec  
RG 18.42  
WM 25.333 mmsec  
TE 298.0 K  
DE 0.0000000 sec  
D0 0.0000000 sec  
D1 1  
dF01 75.508417 MHz  
NUC1 13C  
P0 3.17 mmsec  
P1 8.50 mmsec  
PL1 51.00799846 W  
dF02 300.2612010 MHz  
NUC2 1H  
CPDPRG2 zgpg30  
P0 80.20 mmsec  
PLM2 10.85099883 W  
PLM1 0.16290000 W  
PLM3 0.09703000 W  
F2 - Processing parameters  
SI 65536  
SF 75.508417 MHz  
WDW EM  
SSB 0  
LB 0 Hz  
GB 0  
PC 1.40

1H- and 13C-NMR experiment for (S)-(6-(4-((1S,3R,4S,6S)-6-(hydroxymethyl)quinuclidin-3-yl)-1H-1,2,3-triazol-1-yl)quinolin-4-yl)((1S,2R,4S,5R)-5-vinylquinuclidin-2-yl)methanol (**25**):

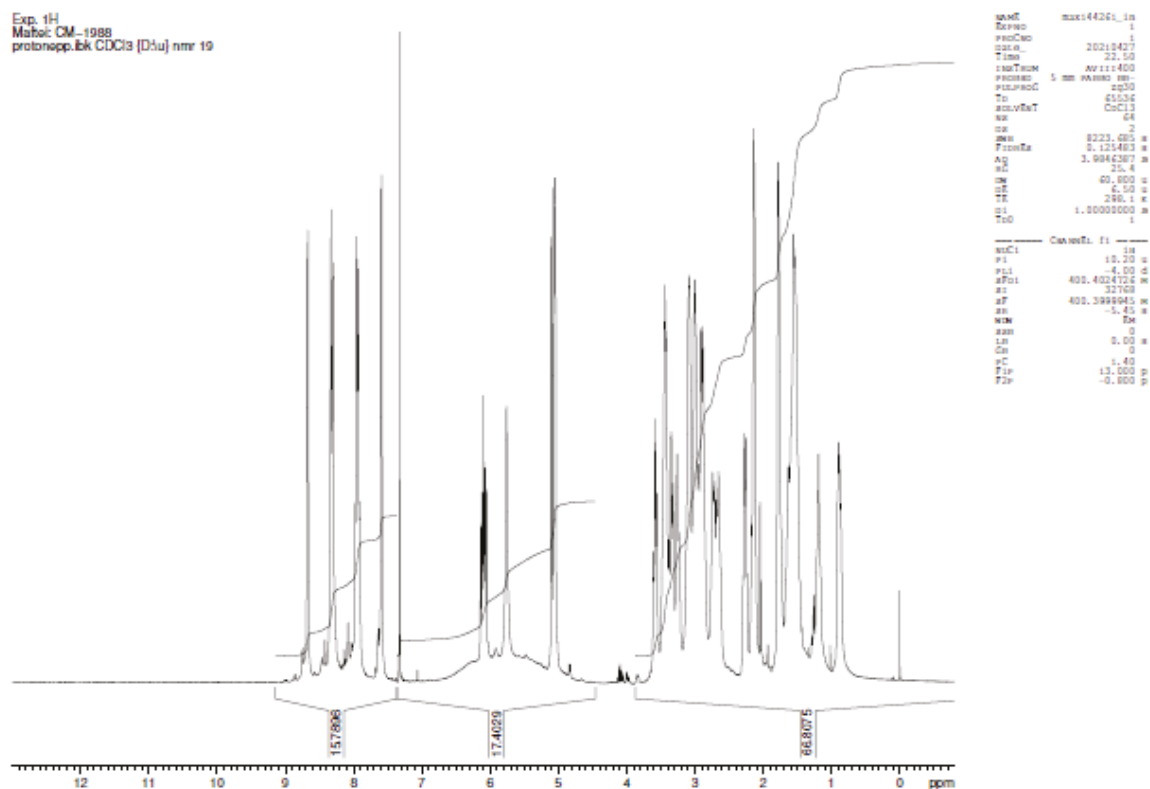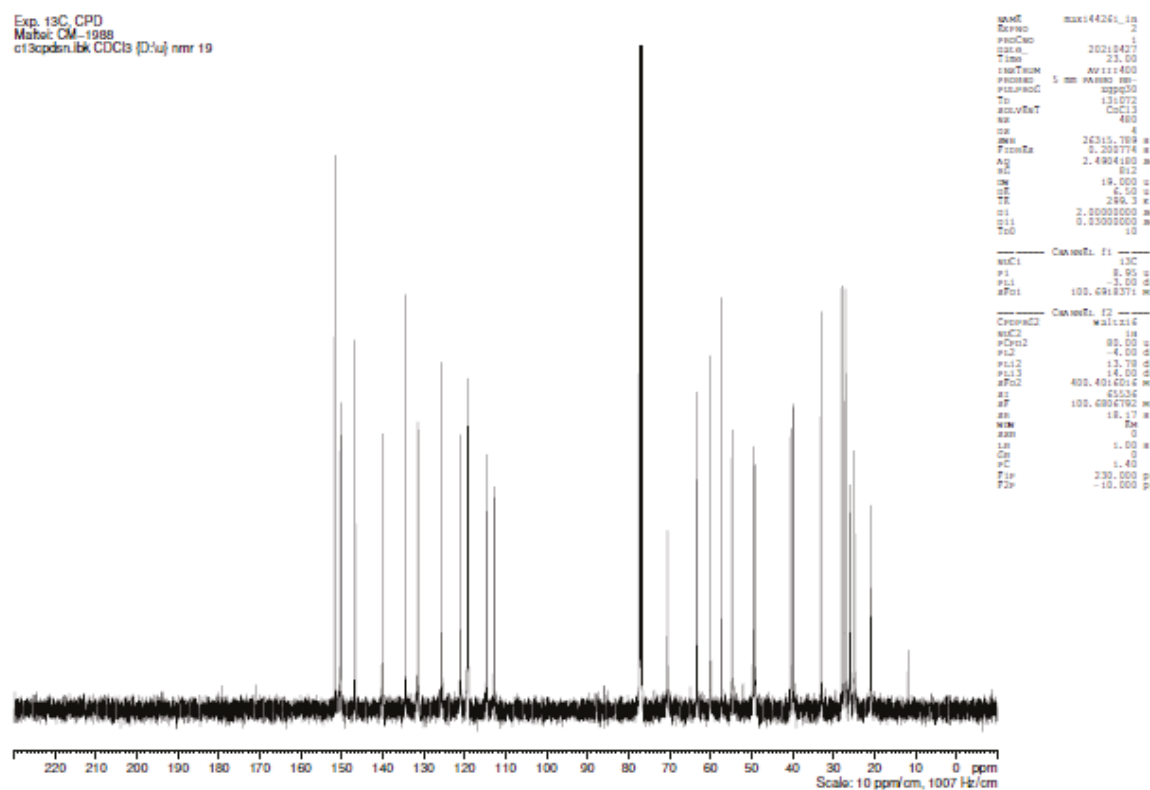



1H- and 13C-NMR experiment for (R)-6-(4-((1S,3R,4S,6R)-6-(hydroxymethyl)quinuclidin-3-yl)-1H-1,2,3-triazol-1-yl)quinolin-4-yl)((1S,2S,4S,5R)-5-vinylquinuclidin-2-yl)methanol (**26**):

no. of the sticker on the nmr tube 214  
color of the label blue  
workgroup Nada  
CM 1980; Cupreline-Triazole-Quinocidine (CUP-T-QCD)  
protonapp\_lib\_35 CDCl3 (D1u) 1h 28

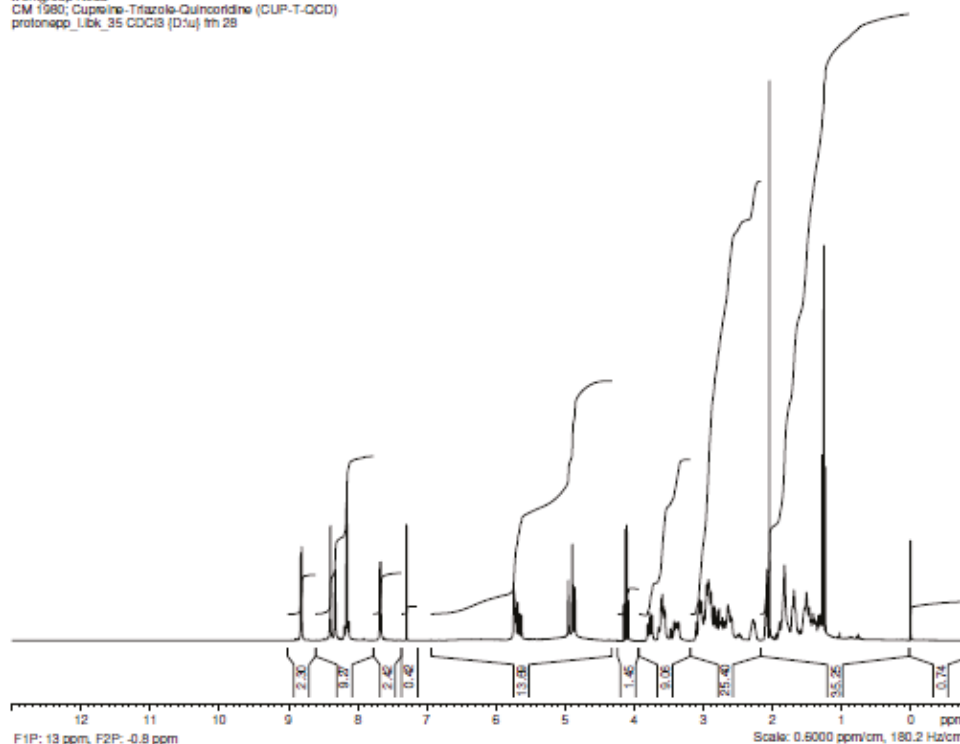

Current data parameters  
NAME fcb-210428-171254\_in  
ExptNo 1  
ProcNo 1

F2 - Acquisition parameters  
Date\_ 20210519  
Time 0.18 h  
INSTRUM Avance300M  
PROBHD z104275\_0359 (1  
PULPROG zgpg30  
TD 49152  
SOLVENT CDCl3  
NS 128  
DS 2  
SWH 6203.474 Hz  
FIDRES 0.262420 Hz  
AQ 3.901611 sec  
RG 39.50  
DM 80.400 USMC  
DE 6.50 USMC  
TE 298.0 K  
D1 1.0000000 sec  
TDO 1  
dF01 300.2618138 MHz  
NUC1 13C  
P0 4.00 USMC  
P1 12.00 USMC  
PLN1 10.85099883 W

F2 - Processing parameters  
SI 32768  
SF 300.2600047 MHz  
WDW EM  
SSB 0  
LB 0 Hz  
GB 0  
PC 1.00

no. of the sticker on the nmr tube 214  
color of the label blue  
workgroup Nada  
CM 1980; Cupreline-Triazole-Quinocidine (CUP-T-QCD)  
c13cpd\_mubk\_35 CDCl3 (D1u) 1h 28

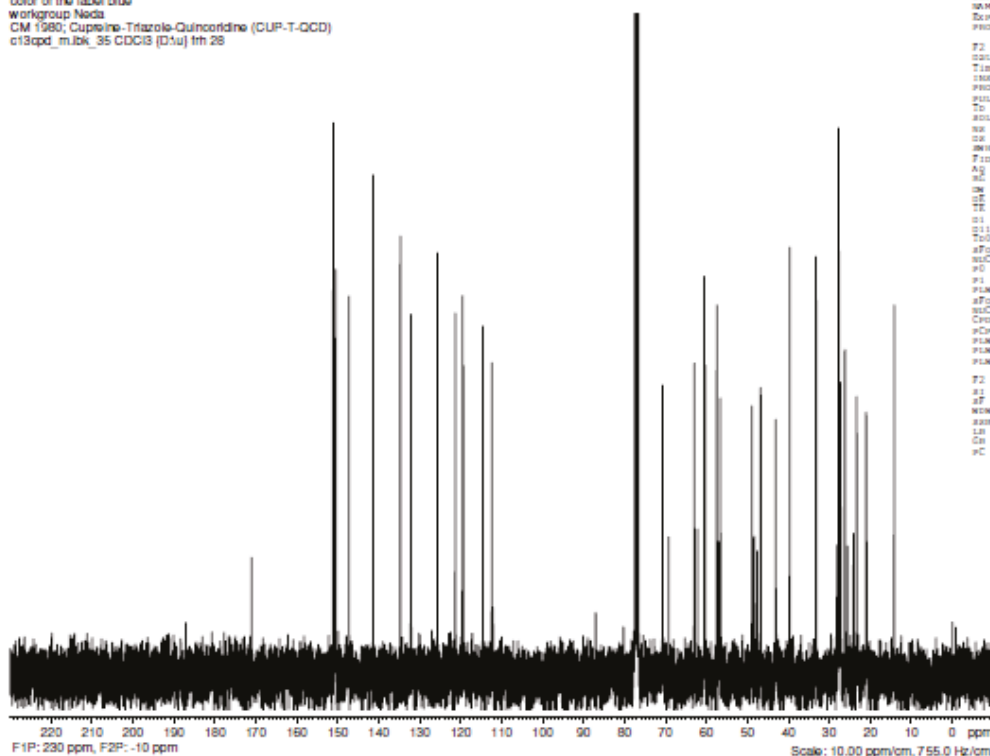

Current data parameters  
NAME fcb-210428-171254\_in  
ExptNo 2  
ProcNo 1

F2 - Acquisition parameters  
Date\_ 20210519  
Time 0.42 h  
INSTRUM Avance300M  
PROBHD z104275\_0359 (1  
PULPROG zgpg30  
TD 65104  
SOLVENT CDCl3  
NS 304  
DS 4  
SWH 19736.842 Hz  
FIDRES 0.401547 Hz  
AQ 2.4903679 sec  
RG 18.42  
DM 25.333 USMC  
DE 6.50 USMC  
TE 298.0 K  
D1 2.0000000 sec  
TDO 1  
dF01 75.5088171 MHz  
NUC1 13C  
P0 3.17 USMC  
P1 51.06798846 W  
PLN1 300.2612010 MHz  
dF02 75.5088171 MHz  
NUC2 1H  
CROSSPC[2] waltz16  
PCPD2 90.00 USMC  
PLN2 10.85099883 W  
PLN3 0.16296050 W  
PLN3 0.00703100 W

F2 - Processing parameters  
SI 65536  
SF 75.5088171 MHz  
WDW EM  
SSB 0  
LB 1.00 Hz  
GB 0  
PC 1.40

1H- and 13C-NMR experiment for (R)-(6-(4-((1S,3R,4S,6S)-6-(hydroxymethyl)quinuclidin-3-yl)-1H-1,2,3-triazol-1-yl)quinolin-4-yl)((1S,2S,4S,5R)-5-vinylquinuclidin-2-yl)methanol (**27**):

no. of the sticker on the nmr tube 702  
color of the label blue  
workgroup Neda  
CUP-Triazol-QC; CM 1987  
protonapp\_m\_bk\_35 CDCl3 [D1u] fth 23

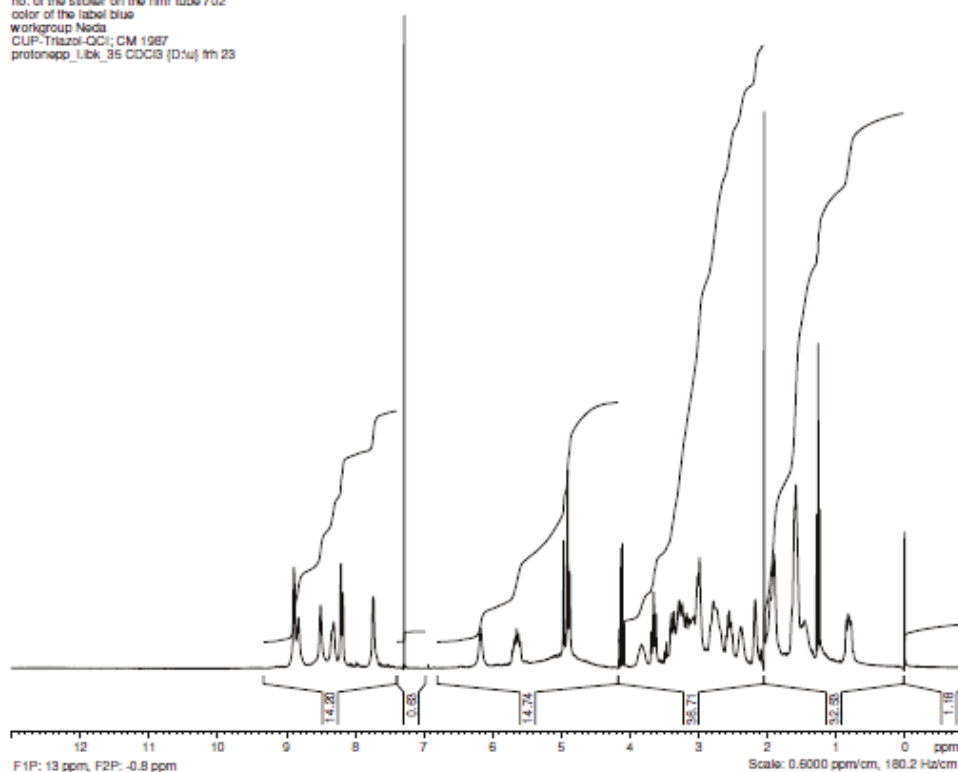

```
Current data parameters
NAME: fth-210423-171022_in
EXPNO: 2
PROCNO: 1
F2 - Acquisition parameters
Date_: 20210424
Time: 2.34 h
INSTRUM: AVI100300N
PROBHD: z10427k_0319 1
PULPROG: zg30
TD: 65536
SOLVENT: CDCl3
NS: 128
DS: 2
SWH: 6203.414 Hz
FIDRES: 0.242420 Hz
AQ: 3.961601 sec
RG: 130.72
SQ: 80.600 uMVC
SE: 6.10 uMVC
TE: 298.0 K
D1: 1.0000000 sec
D2:
DELTA:
aFO1: 300.2618536 MHz
NUC1: 13C
PC: 4.00 uMVC
PI: 12.00 uMVC
PL1: 10.8509983 W
F2 - Processing parameters
SI: 32768
SF: 300.2600642 MHz
WDW: EM
SSB: 0
LB: 0 Hz
GB: 0
PC: 1.00
```

no. of the sticker on the nmr tube 702  
color of the label blue  
workgroup Neda  
CUP-Triazol-QC; CM 1987  
c13cpd\_m\_bk\_35 CDCl3 [D1u] fth 23

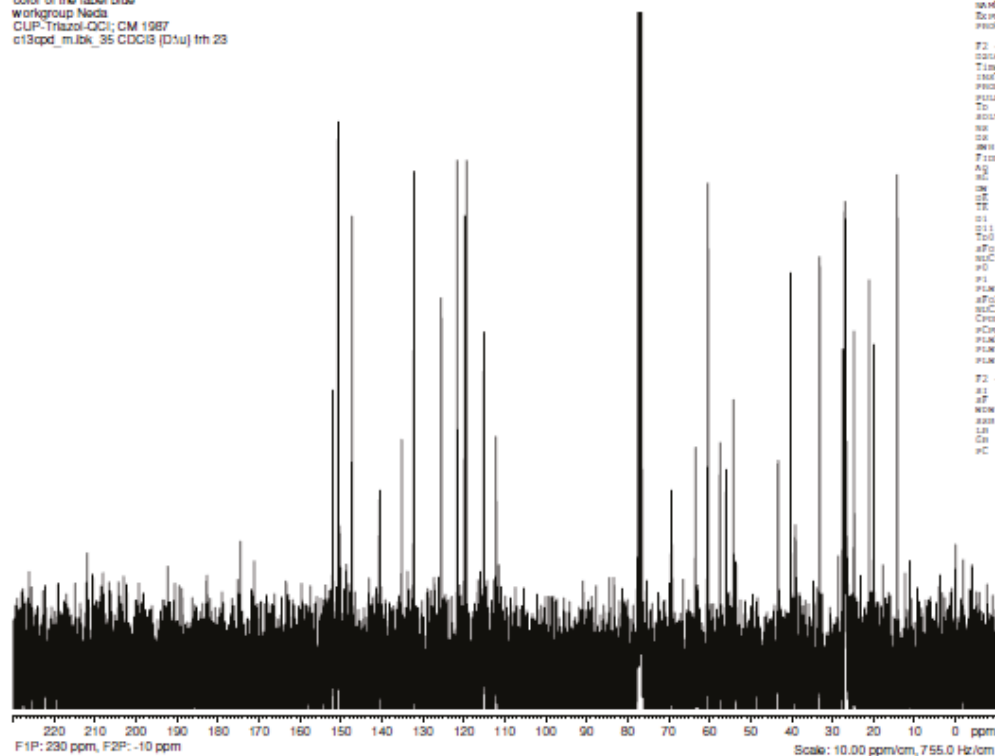

```
Current data parameters
NAME: fth-210423-171022_in
EXPNO: 2
PROCNO: 1
F2 - Acquisition parameters
Date_: 20210424
Time: 2.34 h
INSTRUM: AVI100300N
PROBHD: z10427k_0319 1
PULPROG: zgpg30
TD: 65536
SOLVENT: CDCl3
NS: 304
DS: 4
SWH: 19736.842 Hz
FIDRES: 0.401547 Hz
AQ: 2.4903679 sec
RG: 22.61
SQ: 25.333 uMVC
SE: 6.10 uMVC
TE: 298.0 K
D1: 2.0000000 sec
D2: 0.3300000 sec
DELTA:
aFO1: 75.5088171 MHz
NUC1: 13C
PC: 3.17 uMVC
PI: 9.10 uMVC
PL1: 51.0579868 W
aFO2: 300.2612010 MHz
NUC2: 1H
CPDPRG2: waltz16
PCPD2: 90.00 uMVC
PLM2: 10.8509983 W
PLM3: 0.0091000 W
PLM13: 0.0070310 W
F2 - Processing parameters
SI: 65536
SF: 75.5054427 MHz
WDW: EM
SSB: 0
LB: 1.00 Hz
GB: 0
PC: 1.40
```

<sup>1</sup>H- and <sup>13</sup>C-NMR experiment for (S)-6-(4-((1S,3R,4S,6R)-6-(hydroxymethyl)quinuclidin-3-yl)-1H-1,2,3-triazol-1-yl)quinolin-4-yl)((1S,2R,4S,5R)-5-ethylquinuclidin-2-yl)methanol (**28**):

no. of the sticker on the nmr tube 220  
color of the label blue  
workgroup Neda  
CM 1983; Dihydrocupreidine-Triazol-Guicordine (DHCupD-T-GCD)  
protonapp\_Libk\_35 CDC13 (D1u) 1h 34

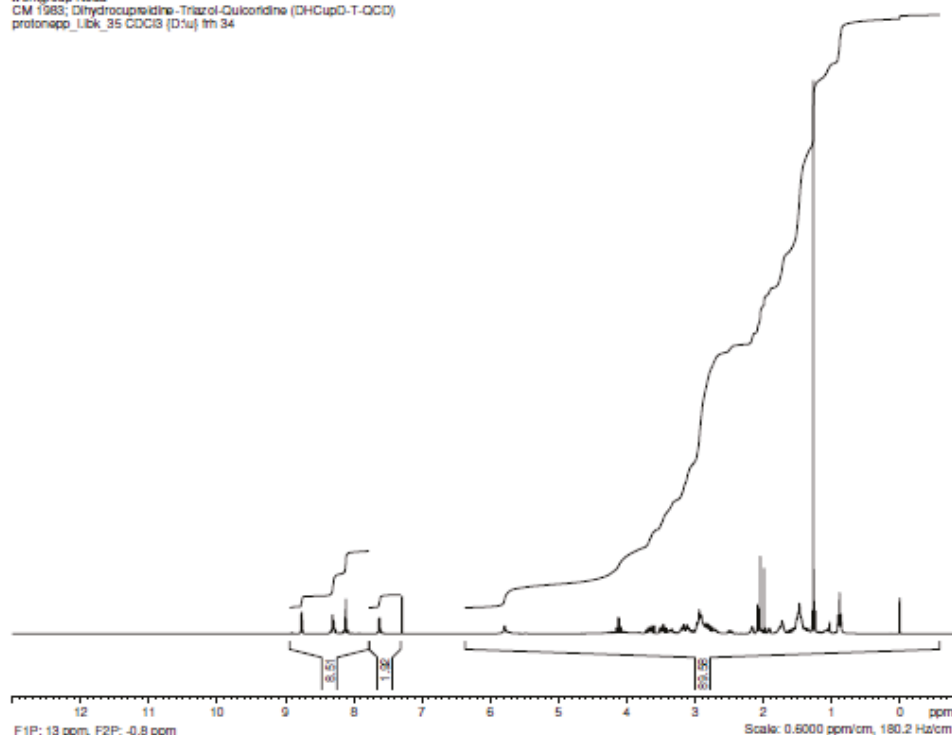

Current data parameters  
NAME fcb-210518-190557\_in  
ExptNo 1  
ProcNo 1  
F2 - Acquisition parameters  
Date\_ 20210519  
Time 6.57 h  
InstName AVE500000  
PROBHD 2104275\_0349  
PULPROG zgpg30  
TD 65536  
SOLVENT CDCl3  
NS 128  
DS 2  
SWH 6203.474 Hz  
FIDRES 0.252420 Hz  
AQ 3.561641 sec  
RG 89.15  
WM 80.600 UMHz  
QT 6.50 UMHz  
TE 298.0 K  
D1 1.0000000 sec  
TDO 1  
SFO1 300.2615136 MHz  
NUC1 1H  
P0 6.00 UMHz  
P1 12.00 UMHz  
PL1 10.85099883 W  
F2 - Processing parameters  
SI 32768  
SF 300.260044 MHz  
WDW EM  
SSB 0  
LB 0 Hz  
GB 0  
PC 1.00

no. of the sticker on the nmr tube 220  
color of the label blue  
workgroup Neda  
CM 1983; Dihydrocupreidine-Triazol-Guicordine (DHCupD-T-GCD)  
c13cpd\_Libk\_35 CDC13 (D1u) 1h 34

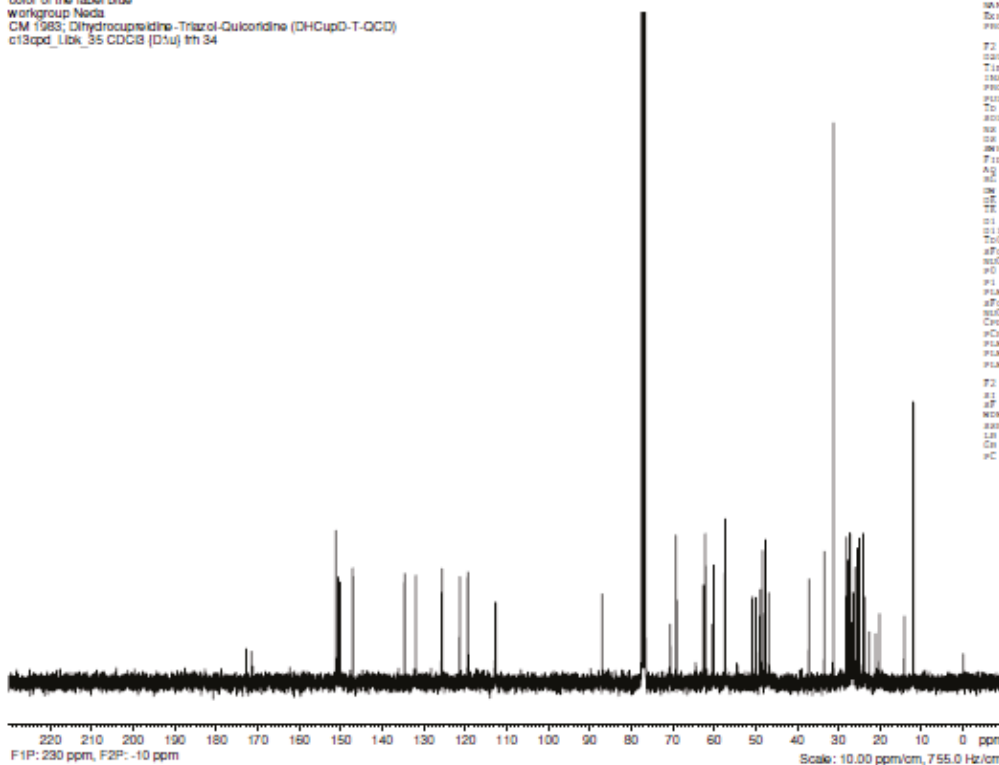

Current data parameters  
NAME fcb-210518-190557\_in  
ExptNo 2  
ProcNo 1  
F2 - Acquisition parameters  
Date\_ 20210519  
Time 6.52 h  
InstName AVE500000  
PROBHD 2104275\_0349  
PULPROG zgpg30  
TD 65536  
SOLVENT CDCl3  
NS 696  
DS 8  
SWH 19736.842 Hz  
FIDRES 0.401547 Hz  
AQ 2.4603479 sec  
RG 18.62  
WM 25.332 UMHz  
QT 6.50 UMHz  
TE 298.0 K  
D1 2.0000000 sec  
TDO 0.0300000 sec  
SFO1 75.508171 MHz  
NUC1 13C  
P0 3.17 UMHz  
P1 9.50 UMHz  
PL1 51.05799866 W  
SFO2 300.2612010 MHz  
NUC2 1H  
CPDPRG2 waltz16  
PCPD2 80.00 UMHz  
PLM2 10.85099883 W  
PLM2 0.16091000 W  
PLM2 0.09703100 W  
F2 - Processing parameters  
SI 65536  
SF 75.508435 MHz  
WDW EM  
SSB 0  
LB 1.00 Hz  
GB 0  
PC 1.40

1H- and 13C-NMR experiment for (R)-6-(4-((1S,3R,4S,6R)-6-(hydroxymethyl)quinuclidin-3-yl)-1H-1,2,3-triazol-1-yl)quinolin-4-yl)((1S,2S,4S,5R)-5-ethylquinuclidin-2-yl)methanol (**30**):

no. of the sticker on the nmr tube 221  
color of the label blue  
workgroup Neda  
CM 1982; Dihydrocupreine-Triazol-Quinolone (DHCUP-T-QCQ)  
protonapp Libk 35 CDC/3 [D:u] fm 35

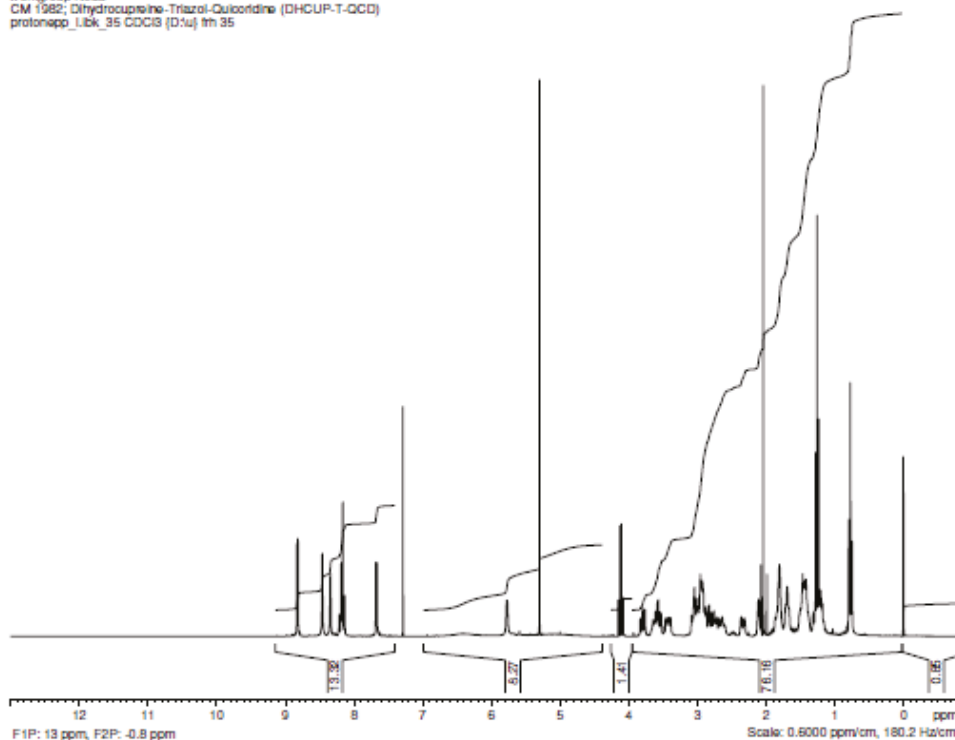

```
Current data parameters
NAME      frb-202001-180904.in
Ntimes    1
Nchan      8
Nfreq      1
F2 - Acquisition parameters
Date       20200109
Time       6.34 h
Observer   AVI100000000
PROGRAM   zid4757_0356.f
PULPROG    zg30
PCPPROG     0
PCPDPRG     0
PCPDPRG2    0
SR         128
MW          6203.474 MHz
BW          9.230420 MHz
SFO         3.9616561 MHz
F0          100.72
SF           80.40 MHz
DM           6.50 MHz
DM2         298.0
SF1          1.000000000 MHz
F1           300.2618138 MHz
F2           8.0 MHz
F3           8.0 MHz
P1           12.50 MHz
P2           10.50099683 MHz
F2 - processing parameters
NAME      300.2601010 MHz
Ntimes    0
Nchan      8
Nfreq      0
SR         0
MW          0
BW          0
SFO         0
F0          0
SF           0
DM           0
DM2         0
SF1          0
F1           0
F2           1.00
```

no. of the slider on the nmr tube 299  
color of the label blue  
workgroup Neda  
CM 1980; Dihydrocupreidine-Triazole-Quinocine (DH-Cup-D-T-QC)  
c13acd\_mjbk 35 MeOD (D<sub>2</sub>O) fh 25

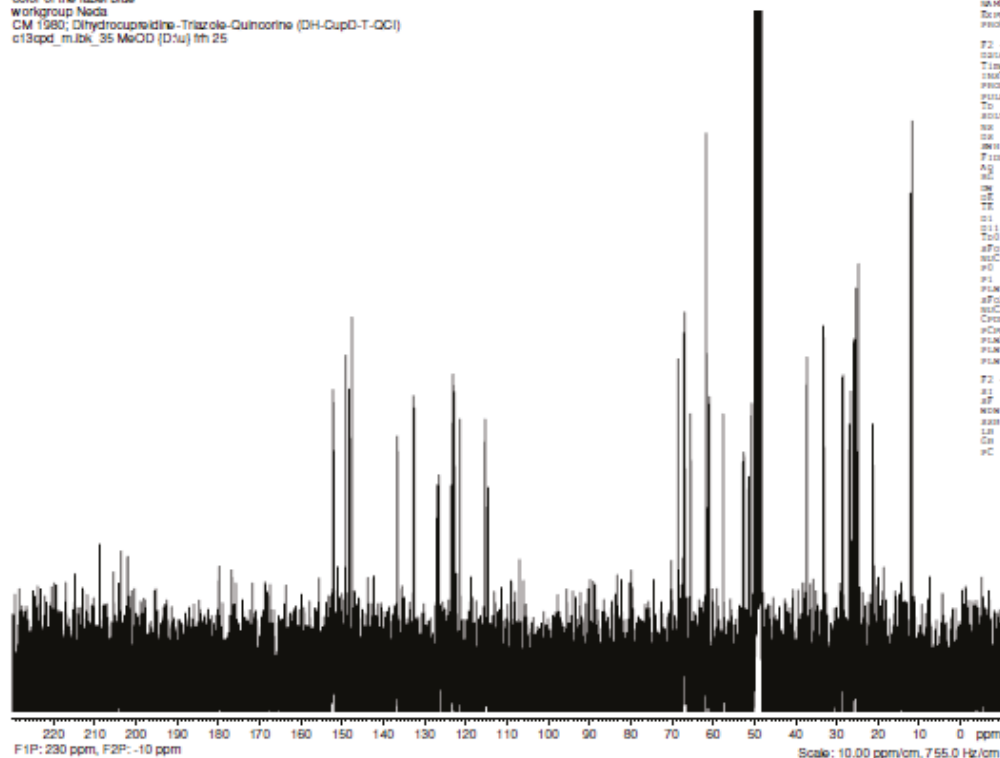

```

Current data parameters
NAME      Feb-2015-1800sk_in
EXPNO     2
PROCNO    1
PROCNAME  

F2 - Acquisition parameters
NAME      Feb-2015-1800sk_in
TIME      3.33 h
INSTRUM    AUTOSCAN
STARTTIME  2014075-1800
PULPROG    zgpg30
PCPDPRG2    3
AQ         0.004
AQUNIT     ms
RG          304
NS          4
DS          1
FIDRES     18736.942 Hz
F1RES      8.401547 Hz
AQ         2.469333 sec
RG          57.6
SI          3.533 UMIC
SI          5.40 UMIC
TE          298.0 K
DE          1.0000000
DE          0.13000000 sec
AQ         0.004
AQUNIT     ms
RG          75.508833 MHz
RG          132
P1          9.10 UMIC
P1          51.079966 sec
AQ         300.261200 MHz
AQ         1.0000000
CYCLES2    2
PCPDPRG2    waltz16
PCPDPRG2    0.00 UMIC
PCPDPRG2    10.16509983
PCPDPRG2    0.16291000 MHz
PCPDPRG2    0.09703100 U

```

1H- and 13C-NMR experiment for (R)-(6-(4-((1S,3R,4S,6S)-6-(hydroxymethyl)quinuclidin-3-yl)-1H-1,2,3-triazol-1-yl)quinolin-4-yl)((1S,2S,4S,5R)-5-ethylquinuclidin-2-yl)methanol (**31**):

no. of the sticker on the nmr tube 298

color of the label blue

workgroup Neda

CM 1989; Dihydrocupreine-Triazole-Quinoline (DH-CUP-T-QC)

protonpp.lib, 35 CDCIS (D1u) fh 24

Current data parameters  
NAME fcs-21021-190719\_in  
ExptNo 1  
ProcNo 1

F2 - Acquisition parameters  
Date\_ 20210622  
Time 1.28 h  
InstName AVI100300M  
Proces 2104279\_0349\_1  
PulprogC zgpg30  
TD 65536  
AcqMeth CAC13  
NS 24  
DS 2  
SWH 6203.474 Hz  
Fwhm 8.252420 Hz  
AQ 3.901641 sec  
RG 116.46  
DM 80.620 MHz  
DE 6.50 MHz  
TE 298.0 K  
D1 1.0000000 sec  
TD0 1  
aFol 300.2618138 MHz  
NUC1 13C  
P0 6.00 MHz  
P1 12.00 MHz  
PL1 10.81099883 W

F2 - processing parameters  
SI 32768  
aF 300.2600540 MHz  
WDW EM  
SSB 0  
LB 0 Hz  
GB 0  
PC 1.00

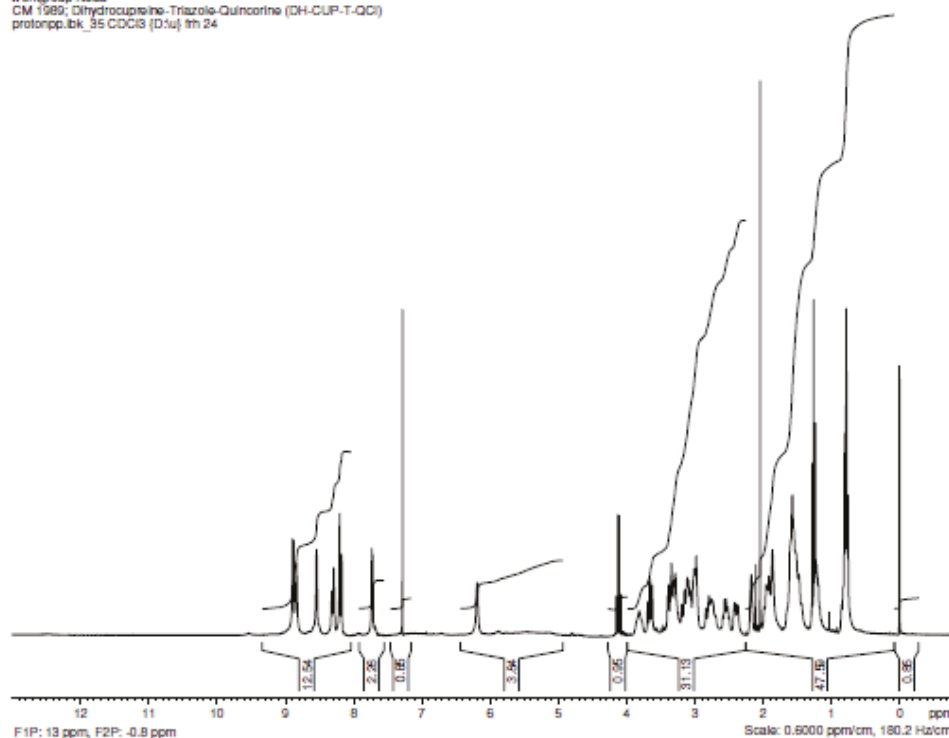

no. of the sticker on the nmr tube 298

color of the label blue

workgroup Neda

CM 1989; Dihydrocupreine-Triazole-Quinoline (DH-CUP-T-QC)

c13qpd.lib, 35 CDCIS (D1u) fh 24

Current data parameters  
NAME fcs-21021-190719\_in  
ExptNo 2  
ProcNo 1

F2 - Acquisition parameters  
Date\_ 20210622  
Time 1.23 h  
InstName AVI100300M  
Proces 2104279\_0349\_1  
PulprogC zgpg30  
TD 65536  
AcqMeth CAC13  
NS 4  
DS 4  
SWH 19736.842 Hz  
Fwhm 8.401547 Hz  
AQ 2.4903670 sec  
RG 11.62  
DM 25.323 MHz  
DE 6.50 MHz  
TE 298.0 K  
D1 2.0000000 sec  
TD0 1  
aFol 75.5088171 MHz  
NUC1 13C  
P0 3.17 MHz  
P1 51.05799866 W  
aFol2 300.2612010 MHz  
NUC2 1H  
CompC[2] waltz16  
PCh2 90.00 MHz  
PLM2 10.81099883 W  
PLM12 0.18291000 W  
PLM13 0.00703050 W

F2 - processing parameters  
SI 65536  
aF 75.5088420 MHz  
WDW EM  
SSB 0  
LB 1.00 Hz  
GB 0  
PC 1.40

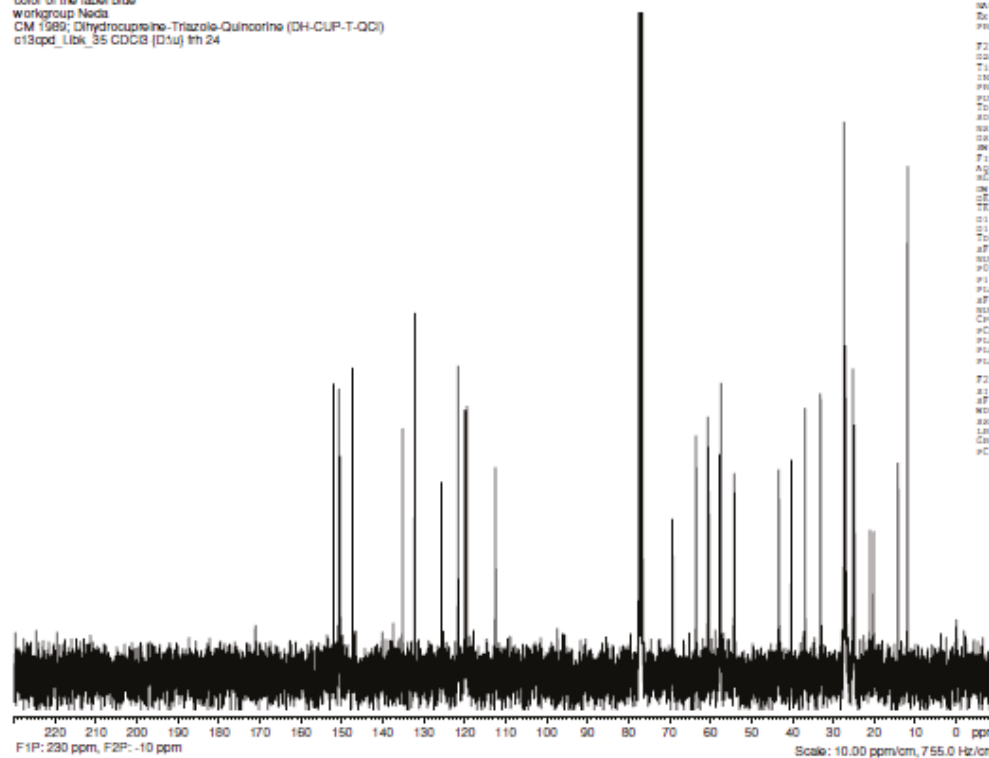

## IR spectroscopy

IR spectrogram for (S)-(6-azidoquinolin-4-yl)((1S,2R,4S,5R)-5-vinylquinuclidin-2-yl)methanol (8):

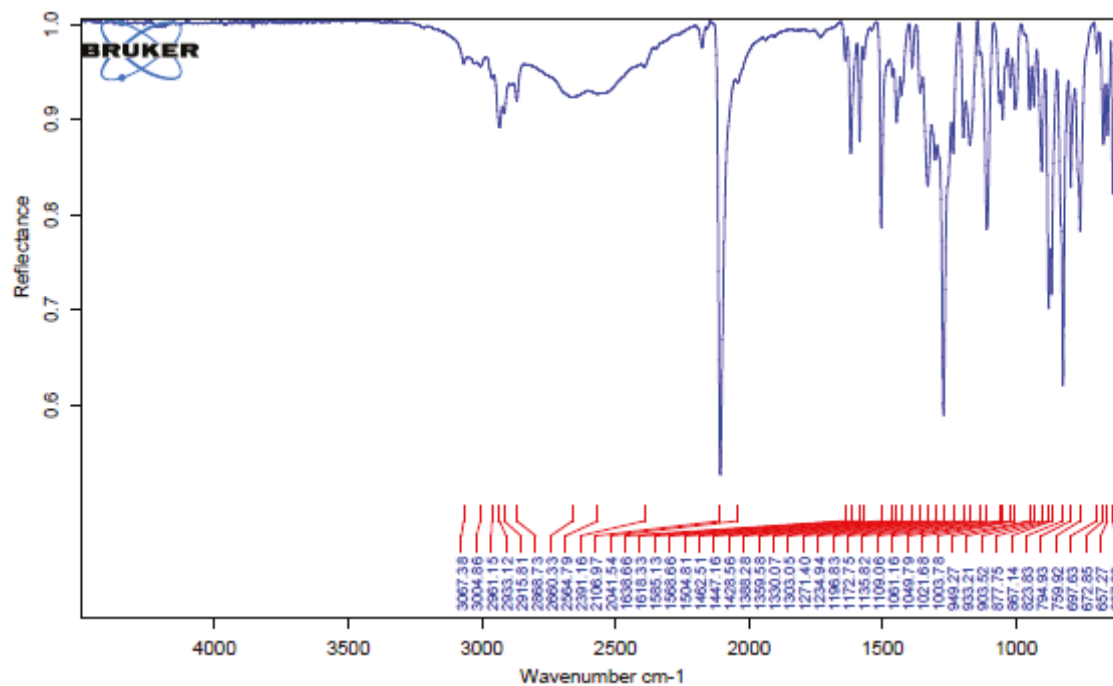

IR spectrogram for (R)-(6-azidoquinolin-4-yl)((1S,2S,4S,5R)-5-vinylquinuclidin-2-yl)methanol (9):

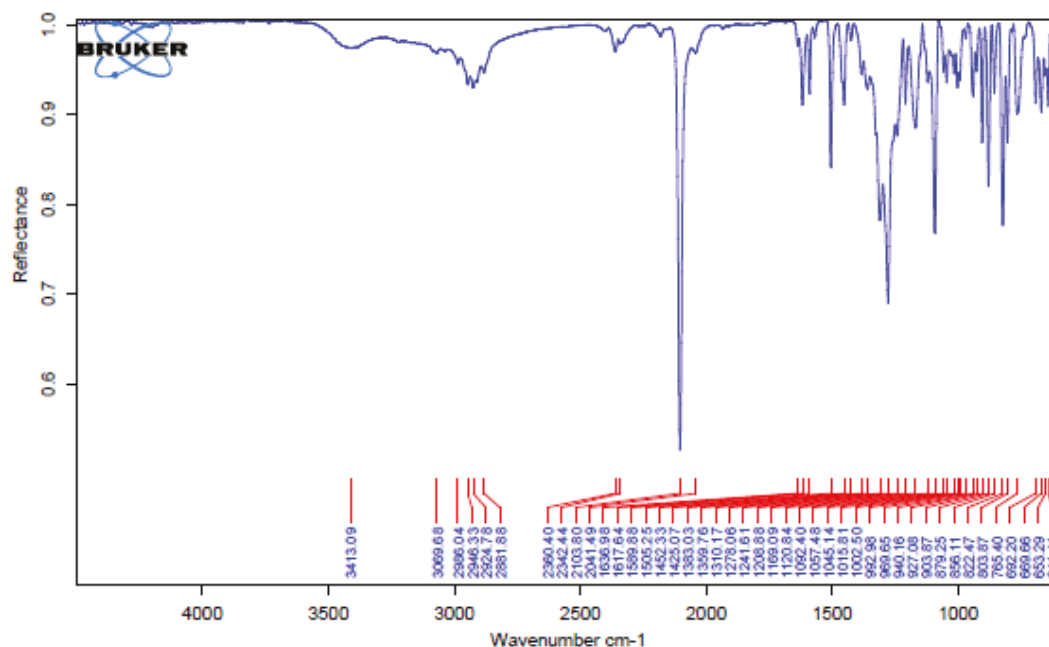

IR spectrogram for (S)-(6-azidoquinolin-4-yl)((1S,2R,4S,5R)-5-ethylquinuclidin-2-yl)methanol (**10**):

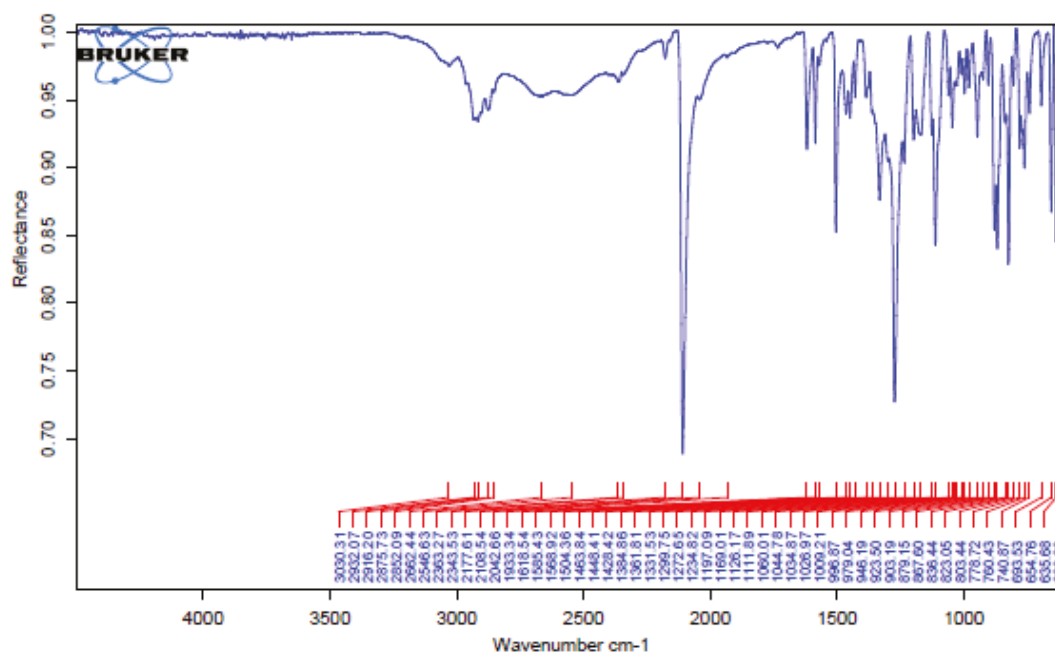

IR spectrogram for (R)-(6-azidoquinolin-4-yl)((1S,2S,4S,5R)-5-ethylquinuclidin-2-yl)methanol (**11**):

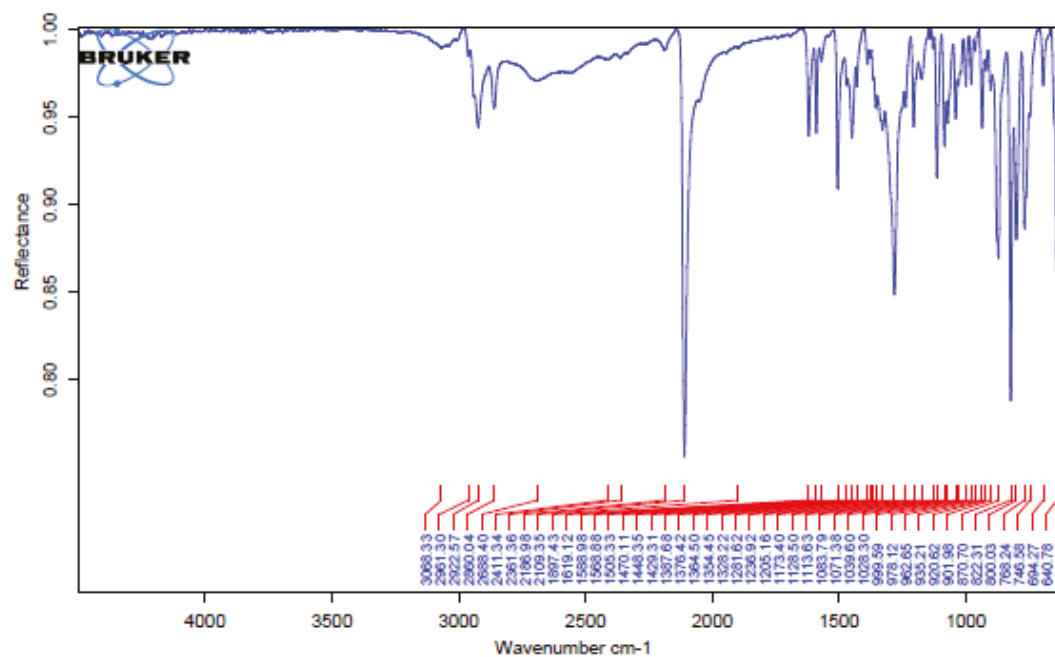

IR spectrogram for (S)-(6-azidoquinolin-4-yl)((1S,2R,4S,5S)-5-ethynylquinuclidin-2-yl)methanol (**12**):

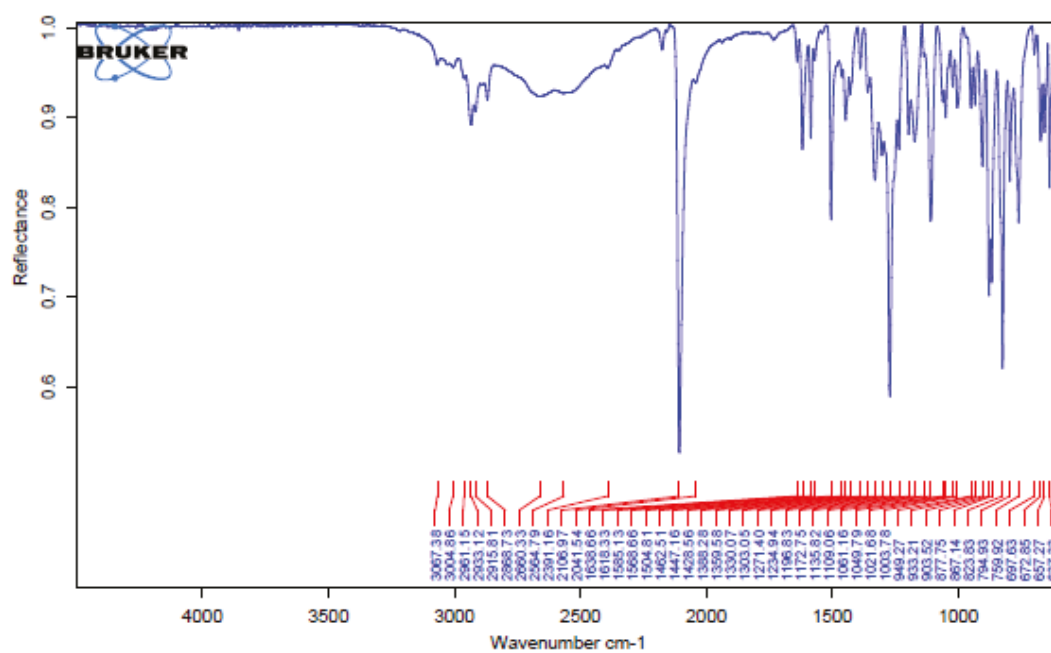

IR spectrogram for (R)-(6-azidoquinolin-4-yl)((1S,2S,4S,5S)-5-ethynylquinuclidin-2-yl)methanol (**13**):

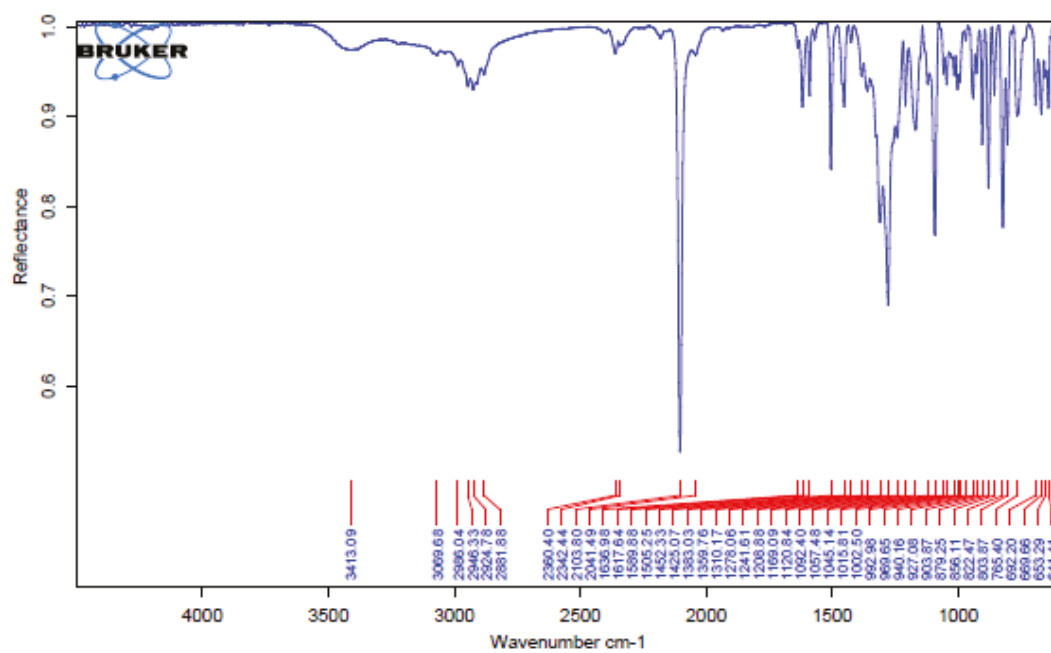



IR spectrogram for (S)-(6-(4-(trimethylsilyl)-1H-1,2,3-triazol-1-yl)quinolin-4-yl)((1S,2R,4S,5R)-5-vinylquinuclidin-2-yl)methanol (**14**):

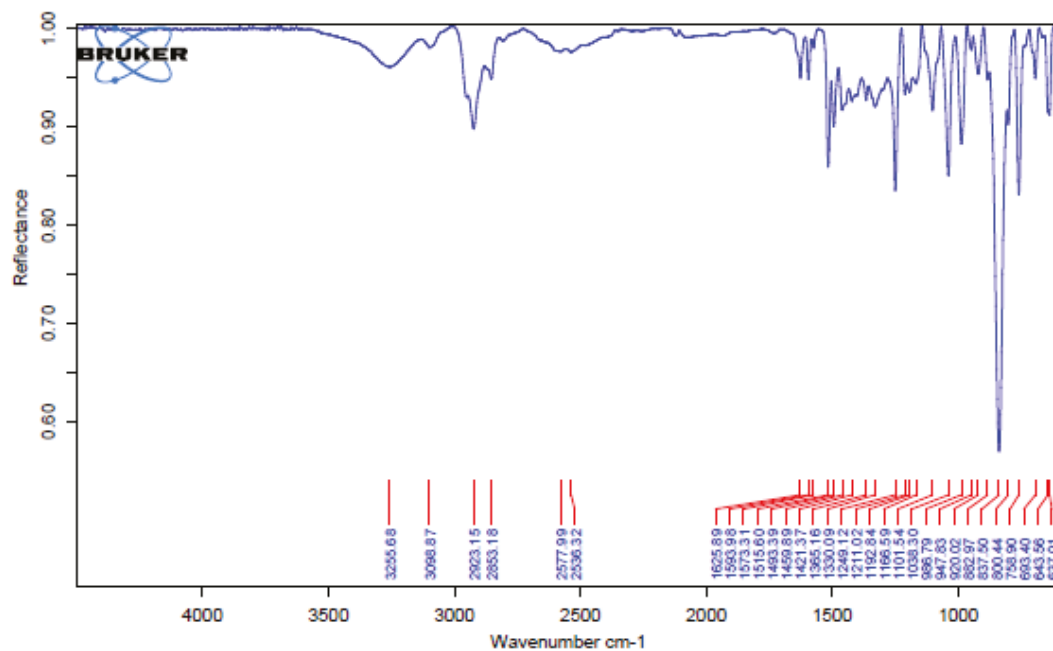

IR spectrogram for (S)-(6-(1H-1,2,3-triazol-1-yl)quinolin-4-yl)((1S,2R,4S,5R)-5-vinylquinuclidin-2-yl)methanol (**15**):

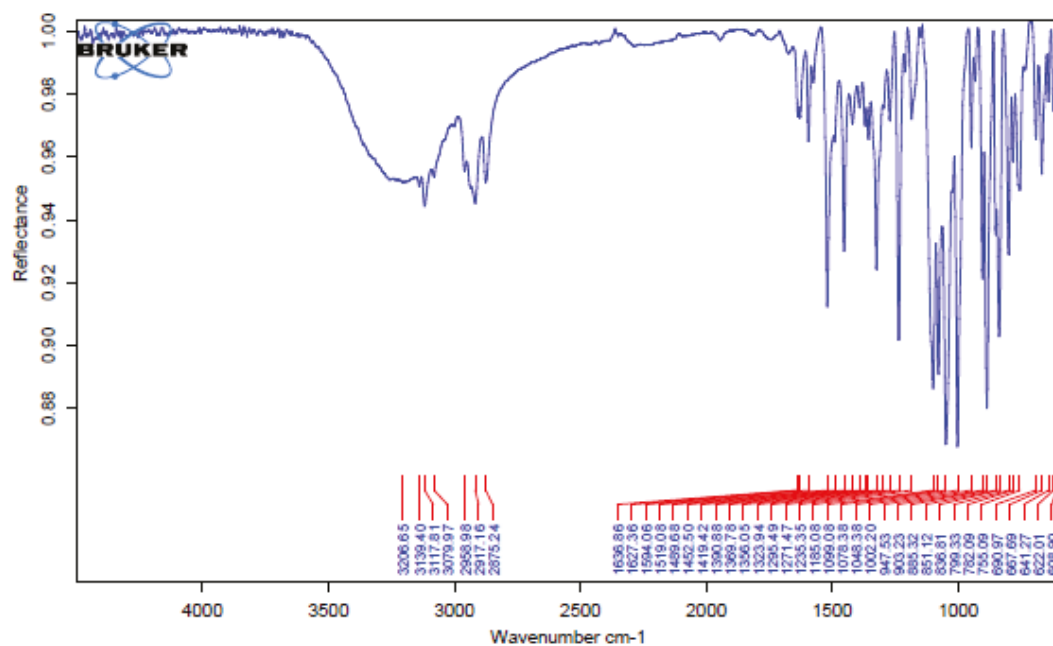

IR spectrogram for (R)-(6-(4-(trimethylsilyl)-1H-1,2,3-triazol-1-yl)quinolin-4-yl)((1S,2S,4S,5R)-5-vinylquinuclidin-2-yl)methanol (**16**):

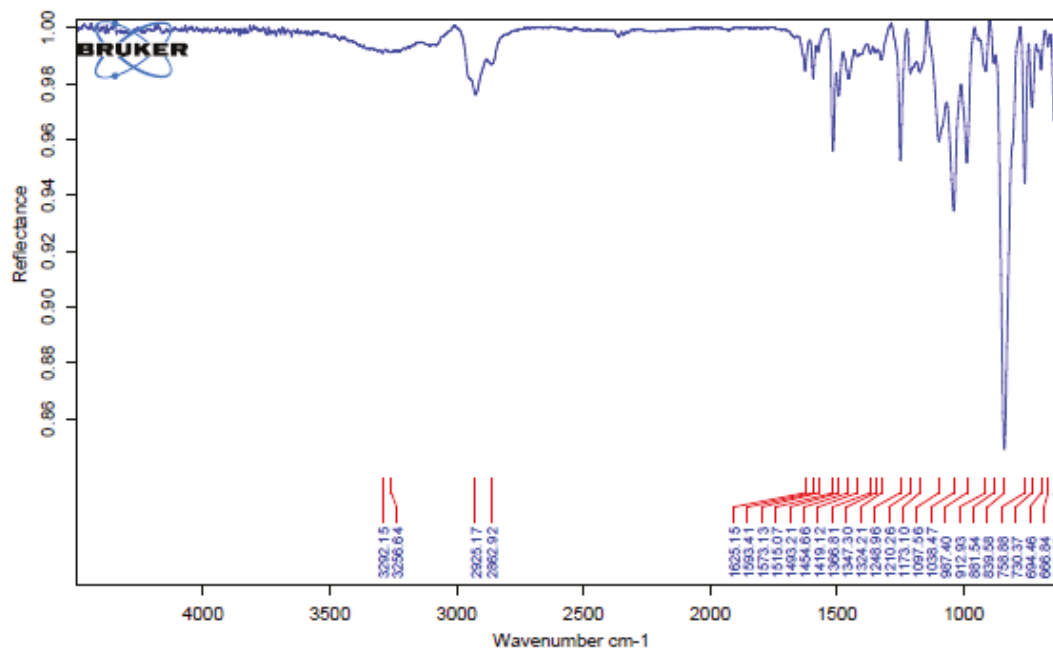

IR spectrogram for (R)-(6-(1H-1,2,3-triazol-1-yl)quinolin-4-yl)((1S,2S,4S,5R)-5-vinylquinuclidin-2-yl)methanol (**17**):

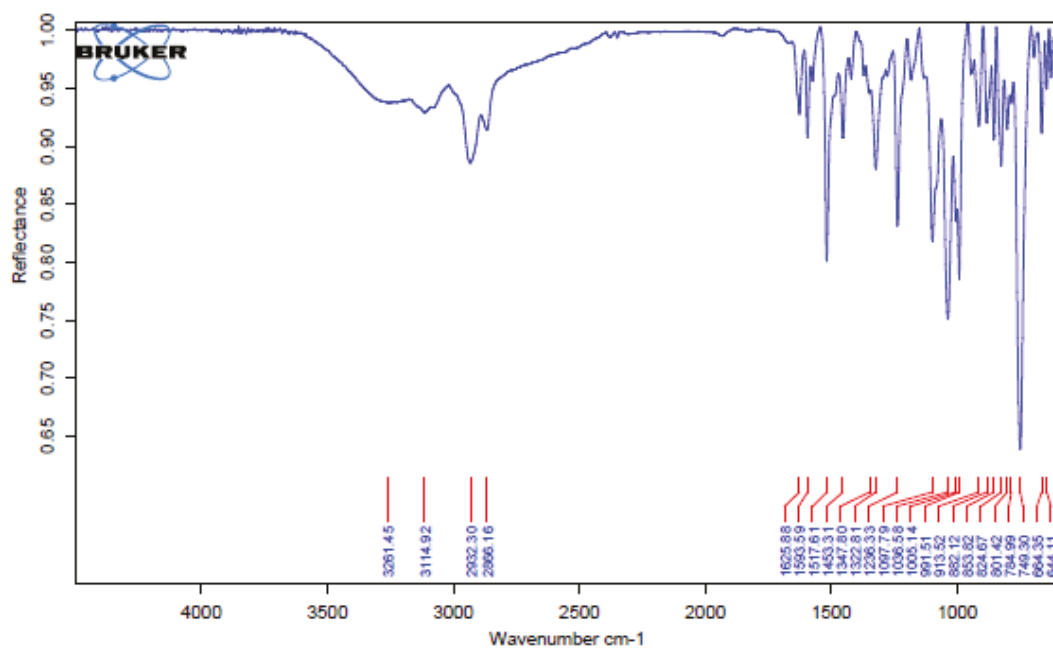

IR spectrogram for (S)-(6-(4-(trimethylsilyl)-1H-1,2,3-triazol-1-yl)quinolin-4-yl)((1S,2R,4S,5R)-5-ethylquinuclidin-2-yl)methanol (**18**):

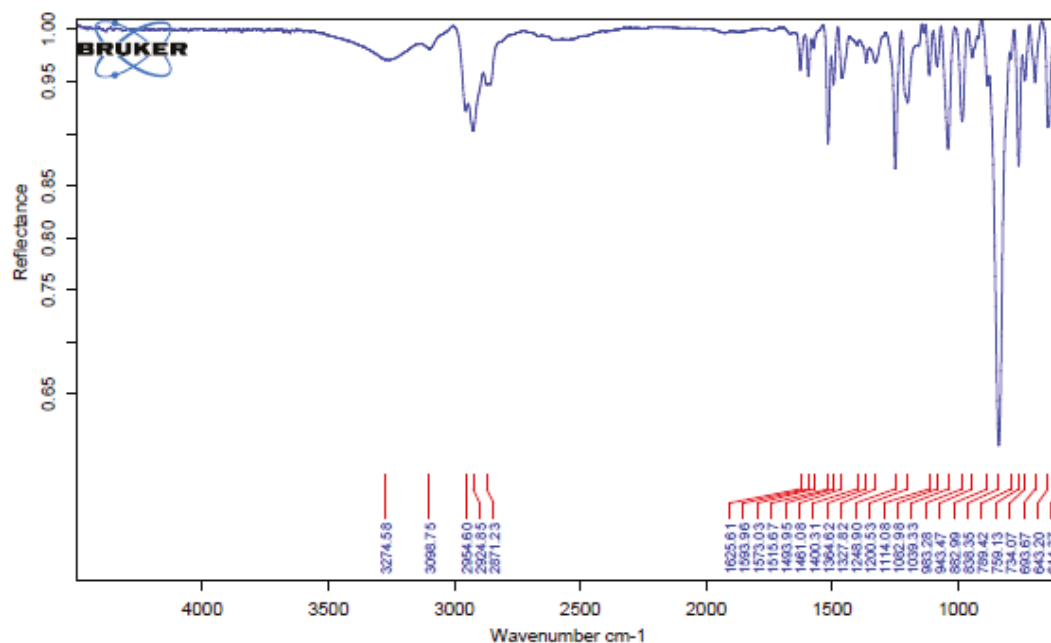

IR spectrogram for (S)-(6-(1H-1,2,3-triazol-1-yl)quinolin-4-yl)((1S,2R,4S,5R)-5-ethylquinuclidin-2-yl)methanol (**19**):

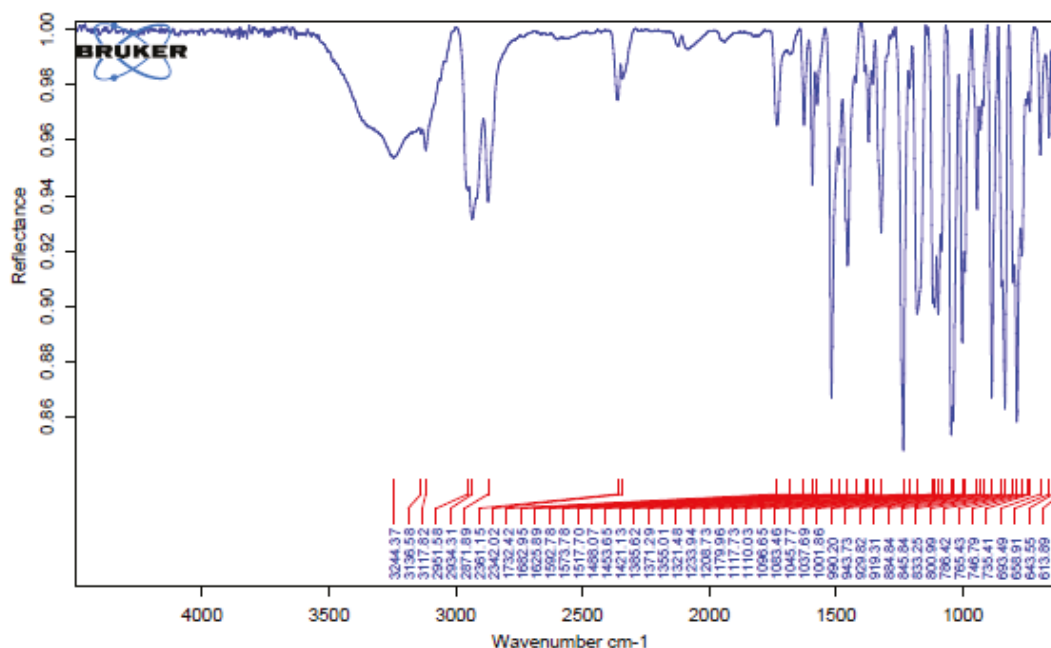

IR spectrogram for (R)-(6-(4-(trimethylsilyl)-1H-1,2,3-triazol-1-yl)quinolin-4-yl)((1S,2S,4S,5R)-5-ethylquinuclidin-2-yl)methanol (**20**):

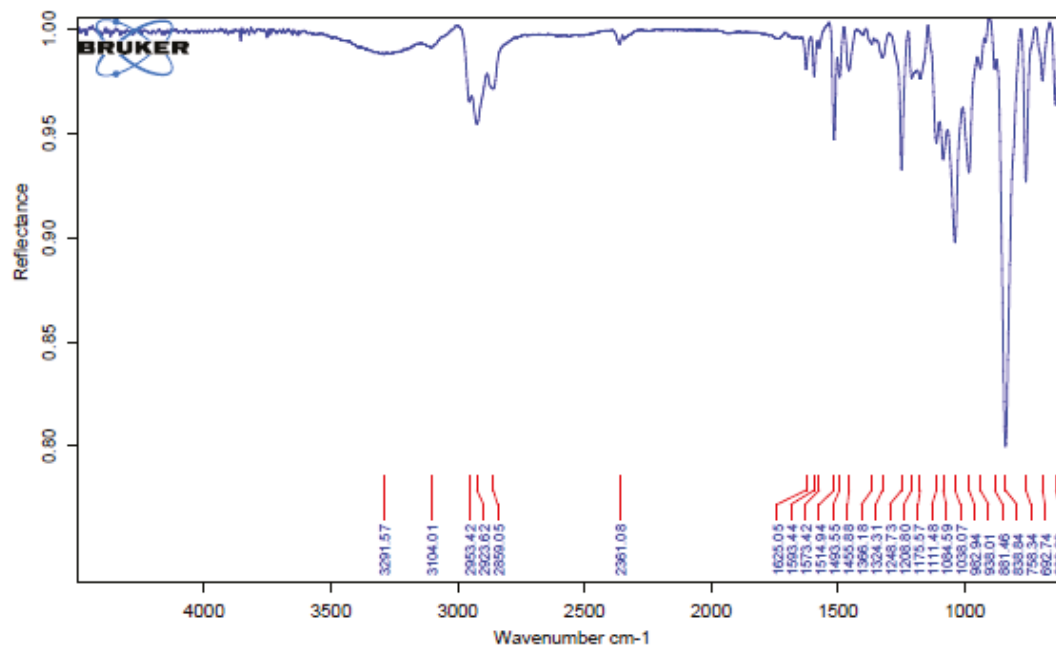

IR spectrogram for (R)-(6-(1H-1,2,3-triazol-1-yl)quinolin-4-yl)((1S,2S,4S,5R)-5-ethylquinuclidin-2-yl)methanol (**21**):

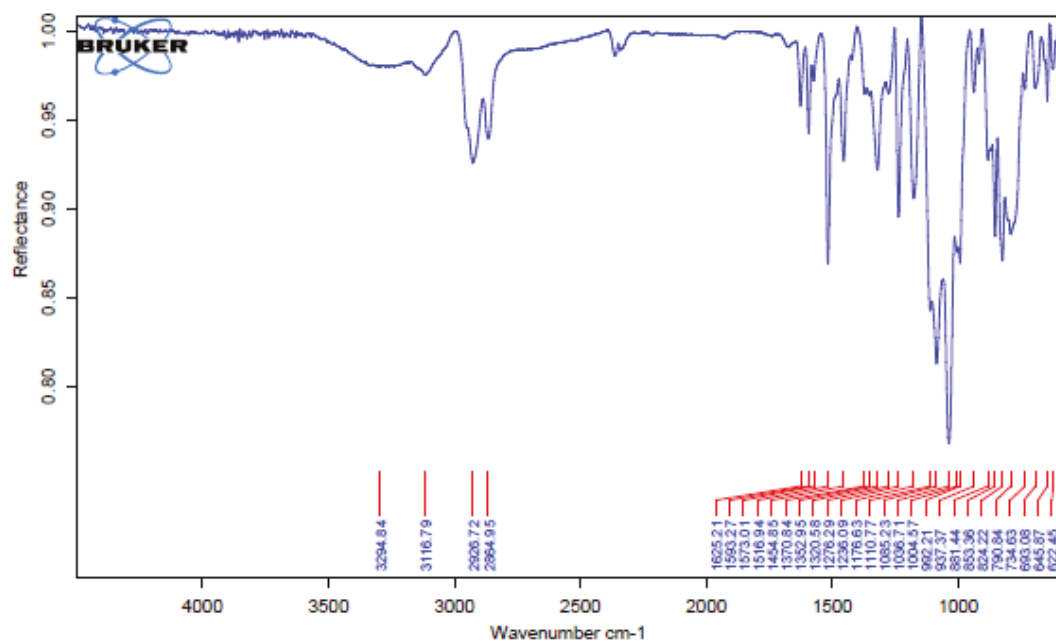

IR spectrogram for (S)-(6-(4-((1S,3R,4S,6R)-6-(hydroxymethyl)quinuclidin-3-yl)-1H-1,2,3-triazol-1-yl)quinolin-4-yl)((1S,2R,4S,5R)-5-vinylquinuclidin-2-yl)methanol (**24**):

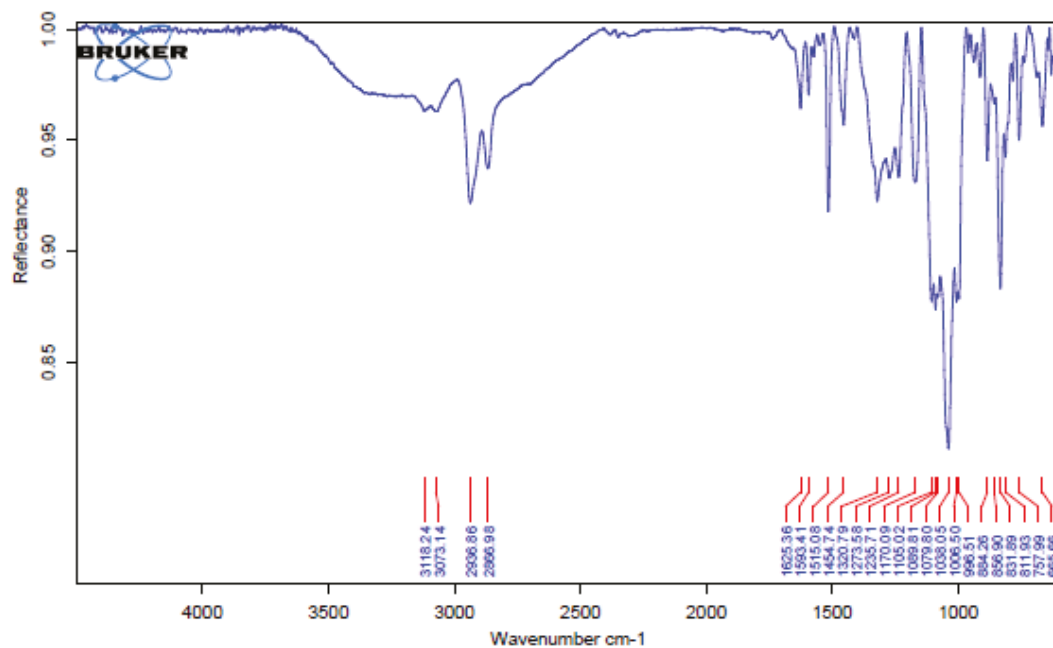

IR spectrogram for (S)-(6-(4-((1S,3R,4S,6S)-6-(hydroxymethyl)quinuclidin-3-yl)-1H-1,2,3-triazol-1-yl)quinolin-4-yl)((1S,2R,4S,5R)-5-vinylquinuclidin-2-yl)methanol (**25**):

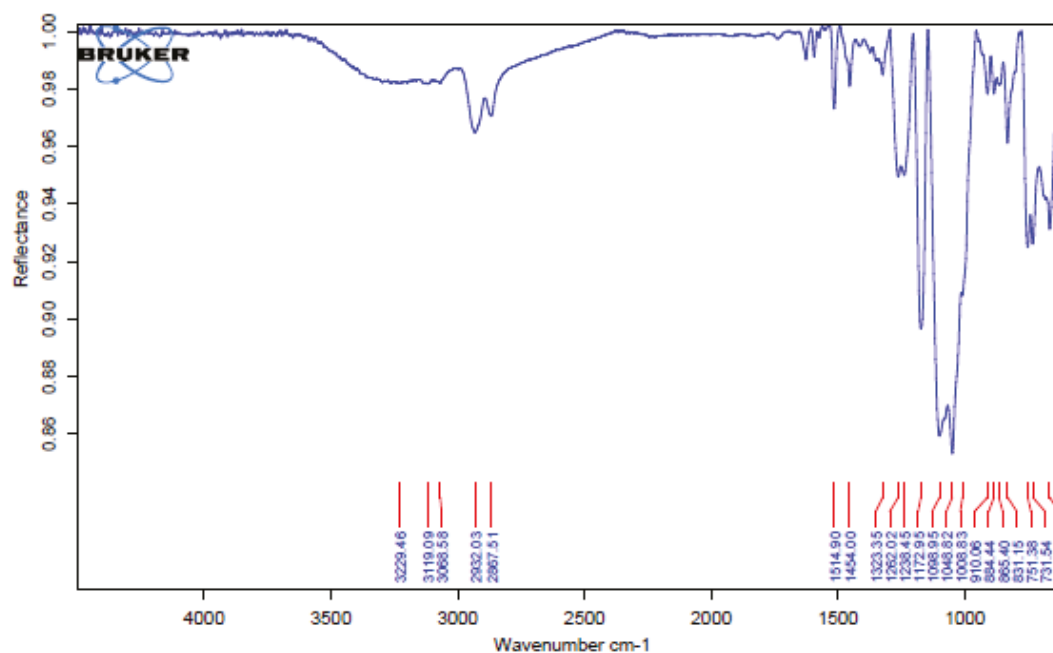

IR spectrogram for (R)-(6-(4-((1S,3R,4S,6R)-6-(hydroxymethyl)quinuclidin-3-yl)-1H-1,2,3-triazol-1-yl)quinolin-4-yl)((1S,2S,4S,5R)-5-vinylquinuclidin-2-yl)methanol (**26**):

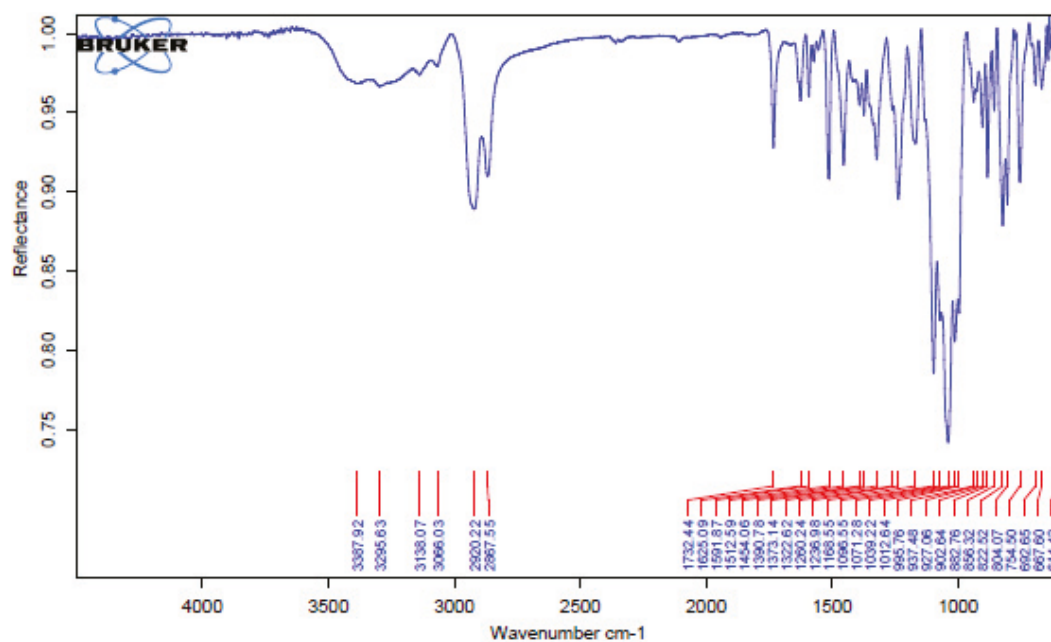

IR spectrogram for (R)-(6-(4-((1S,3R,4S,6S)-6-(hydroxymethyl)quinuclidin-3-yl)-1H-1,2,3-triazol-1-yl)quinolin-4-yl)((1S,2S,4S,5R)-5-vinylquinuclidin-2-yl)methanol (**27**):

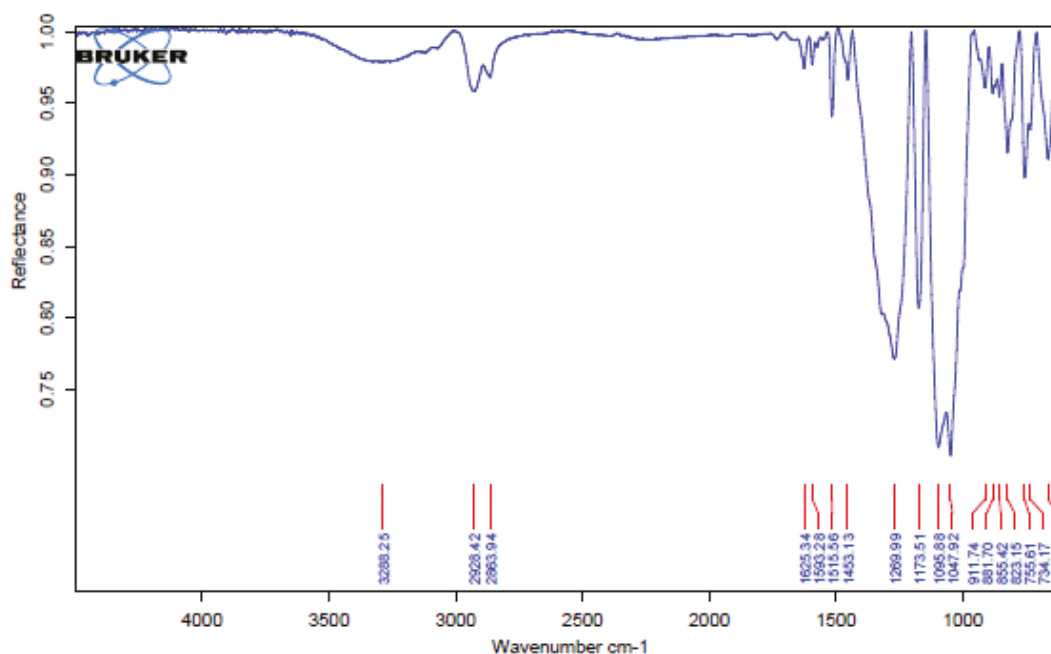

IR spectrogram for (S)-(6-(4-((1S,3R,4S,6R)-6-(hydroxymethyl)quinuclidin-3-yl)-1H-1,2,3-triazol-1-yl)quinolin-4-yl)((1S,2R,4S,5R)-5-ethylquinuclidin-2-yl)methanol (**28**):

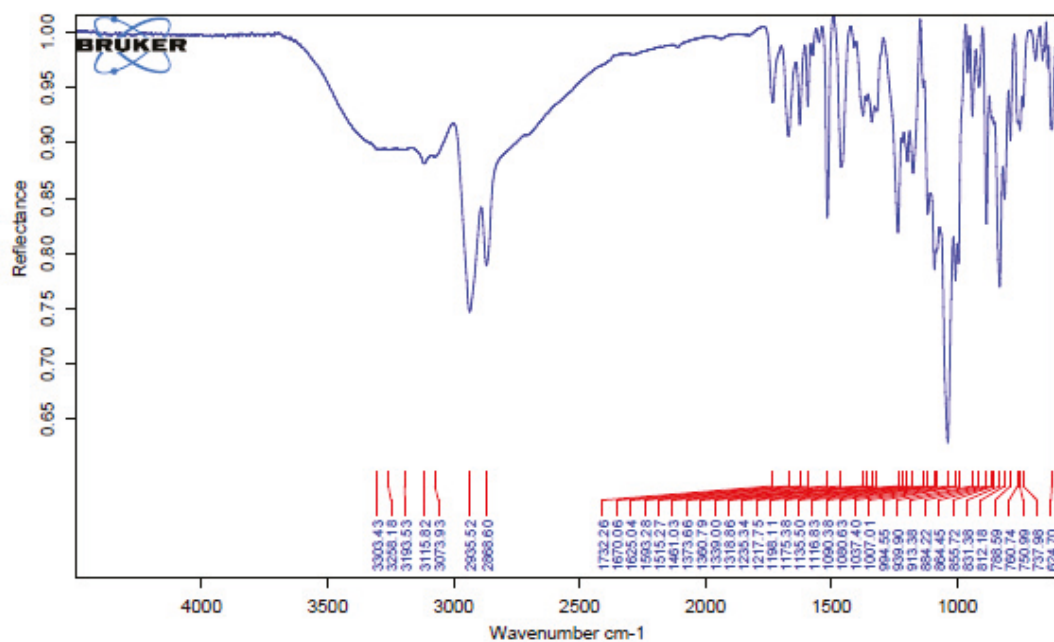

IR spectrogram for (S)-(6-(4-((1S,3R,4S,6S)-6-(hydroxymethyl)quinuclidin-3-yl)-1H-1,2,3-triazol-1-yl)quinolin-4-yl)((1S,2R,4S,5R)-5-ethylquinuclidin-2-yl)methanol (**29**):

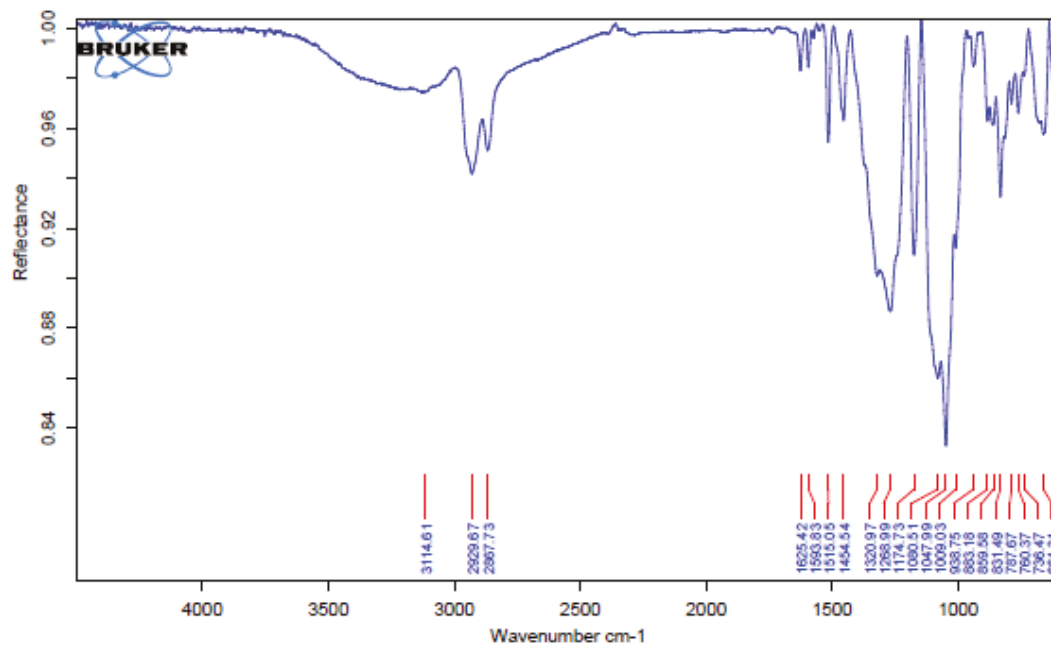

IR spectrogram for (R)-(6-(4-((1S,3R,4S,6R)-6-(hydroxymethyl)quinuclidin-3-yl)-1H-1,2,3-triazol-1-yl)quinolin-4-yl)((1S,2S,4S,5R)-5-ethylquinuclidin-2-yl)methanol (**30**):

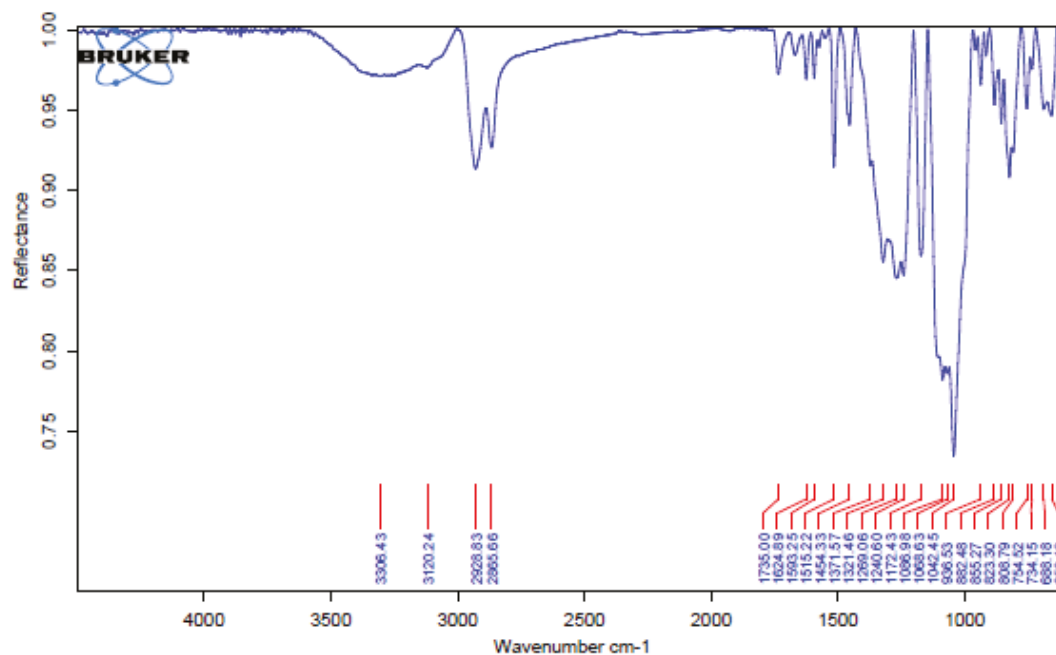

IR spectrogram for (R)-(6-(4-((1S,3R,4S,6S)-6-(hydroxymethyl)quinuclidin-3-yl)-1H-1,2,3-triazol-1-yl)quinolin-4-yl)((1S,2S,4S,5R)-5-ethylquinuclidin-2-yl)methanol (**31**):

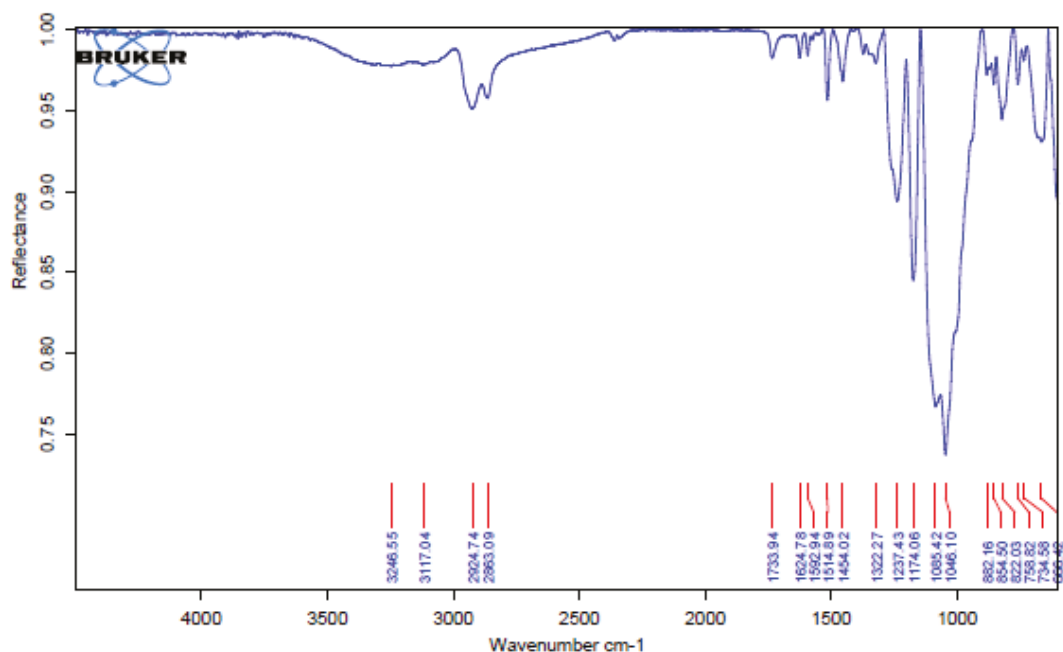



## X ray

**Table S1.** Crystallographic data collection parameter of **10**, **11** and **28**

| Compound                                          | <b>10</b>                                        | <b>11</b>                                                                          | <b>28</b>                                                                                       |
|---------------------------------------------------|--------------------------------------------------|------------------------------------------------------------------------------------|-------------------------------------------------------------------------------------------------|
| Formula                                           | C <sub>19</sub> H <sub>21</sub> N <sub>5</sub> O | C <sub>19</sub> H <sub>23</sub> N <sub>5</sub> O <sub>1</sub> , ½ H <sub>2</sub> O | C <sub>29</sub> H <sub>38</sub> N <sub>6</sub> O <sub>2</sub> , 0.81 HCl, 1.76 H <sub>2</sub> O |
| M <sub>r</sub> /(g mol <sup>-1</sup> )            | 335.41                                           | 346.43                                                                             | 564.03                                                                                          |
| crystal shape                                     | lath                                             | fragment                                                                           | lath                                                                                            |
| crystal colour                                    | clear colourless                                 | clear light brown                                                                  | clear colourless                                                                                |
| cryst. dim. /mm <sup>3</sup>                      | 0.451 ⊗ 0.072 ⊗ 0.035                            | 0.220 ⊗ 0.118 ⊗ 0.022                                                              | 0.379 ⊗ 0.121 ⊗ 0.047                                                                           |
| crystal system                                    | monoclinic                                       | monoclinic                                                                         | orthorhombic                                                                                    |
| space group (no.)                                 | <i>P</i> 2 <sub>1</sub> (4)                      | <i>C</i> 2 (5)                                                                     | <i>C</i> 2 <sub>1</sub> 2 <sub>1</sub> 2 <sub>1</sub> (19)                                      |
| <i>a</i> /Å                                       | 10.4912(3)                                       | 23.1964(4)                                                                         | 8.5435(1)                                                                                       |
| <i>b</i> /Å                                       | 7.6623(2)                                        | 6.3113(1)                                                                          | 14.1133(2)                                                                                      |
| <i>c</i> /Å                                       | 10.6905(3)                                       | 12.0528(3)                                                                         | 24.5445(3)                                                                                      |
| ↗                                                 | 90°                                              | 90°                                                                                | 90°                                                                                             |
| ↗                                                 | 101.591(3)°                                      | 98.714°                                                                            | 90°                                                                                             |
| ↗                                                 | 90°                                              | 90°                                                                                | 90°                                                                                             |
| <i>V</i> /Å <sup>3</sup>                          | 841.85(4)                                        | 1744.16(6)                                                                         | 2959.50(7)                                                                                      |
| <i>Z</i> , <i>Z'</i>                              | 2, 1                                             | 4, 1                                                                               | 4, 1                                                                                            |
| <i>D</i> <sub>calcd.</sub> /(g cm <sup>-3</sup> ) | 1.323                                            | 1.319                                                                              | 1.266                                                                                           |
| ↗ /mm <sup>-1</sup> (↗ ⊗ ⊗ Å)                     | 0.687 (1.54184)                                  | 0.698 (1.54184)                                                                    | 1.338 (1.54184)                                                                                 |
| Absorption corr.                                  | multi-scan                                       | multi-scan                                                                         | multi-scan                                                                                      |
| ⊗ range (compl.)                                  | 4.22 – 77.93° (98.9%)                            | 3.71 – 77.74° (98.0%)                                                              | 4.78 – 77.90° (99.8%)                                                                           |
| refl. measured                                    | 66650                                            | 10314                                                                              | 155939                                                                                          |
| unique ( <i>R</i> <sub>int</sub> )                | 3554 (0.0843)                                    | 3147 (0.0177)                                                                      | 6279 (0.0560)                                                                                   |
| observed <sup>a</sup>                             | 3446                                             | 3096                                                                               | 6221                                                                                            |
| param. / restr.                                   | 230 / 1                                          | 240 / 1                                                                            | 387 / 9                                                                                         |
| <i>R</i> <sub>1</sub> (obs. rflns.) <sup>a</sup>  | 0.0370                                           | 0.0249                                                                             | 0.0408                                                                                          |
| <i>wR</i> <sub>2</sub> (all rflns.)               | 0.1012                                           | 0.0659                                                                             | 0.1086                                                                                          |
| GooF on <i>F</i> <sup>2</sup>                     | 1.025                                            | 1.042                                                                              | 1.058                                                                                           |
| Abs. Struct.                                      | –0.02(12)                                        | –0.02(7)                                                                           | 0.025(3)                                                                                        |
| Param.                                            |                                                  |                                                                                    |                                                                                                 |
| max/min ↗ /(eÅ <sup>-3</sup> )                    | 0.173 / –0.227                                   | 0.167 / –0.147                                                                     | 0.167 / –0.147                                                                                  |
| CCDC No.                                          | 2080994                                          | 2080992                                                                            | 2080993                                                                                         |

<sup>a</sup> Observation criterion:  $I > 2\sigma(I)$ .
